# Supplementary material for: Genome-wide analysis reveals regulatory mechanisms and expression patterns of TGA genes in peanut under abiotic stress and hormone treatments
Source: Frontiers journal article supplement (doi:10.3389/fpls.2023.1269200), 2023-11-21
Supplement: Data_Sheet_1.zip [file Data_Sheet_1.zip]

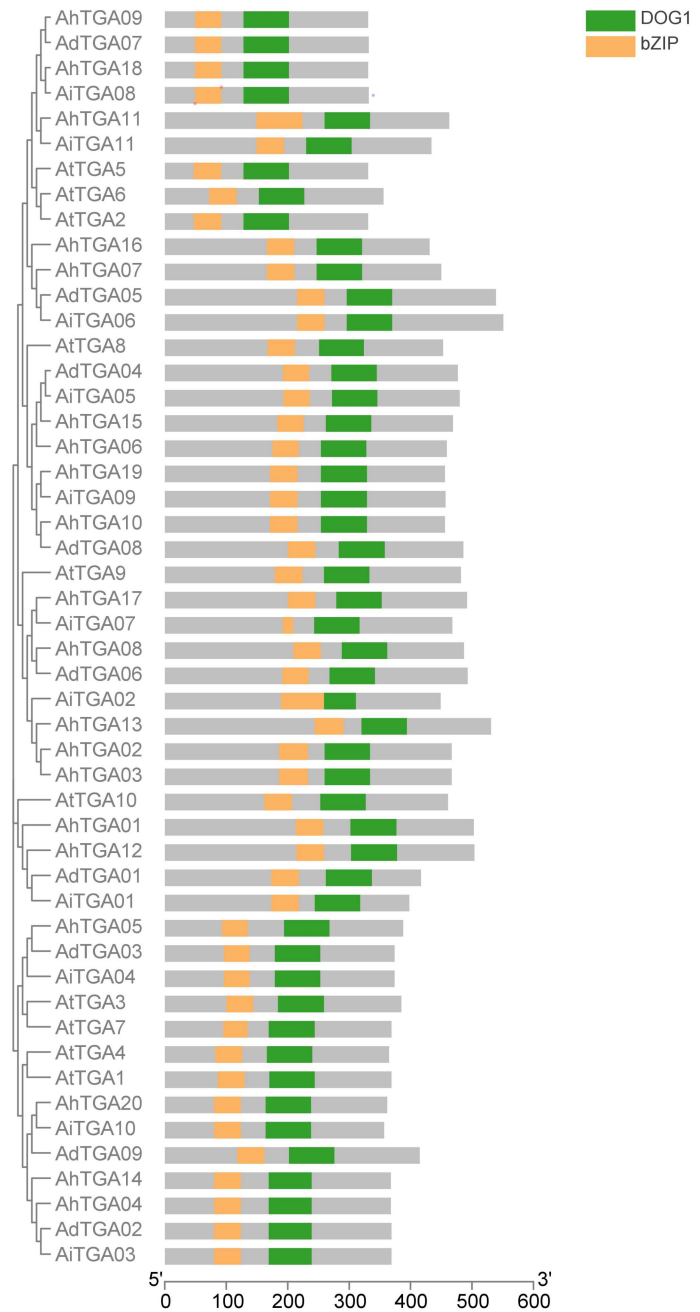

**Figure S1** Comparison of conserved structural domains between *AtTGA* and peanut (cultivated peanut and wild peanuts).
