# Supplementary material for: Genome-wide analysis reveals regulatory mechanisms and expression patterns of TGA genes in peanut under abiotic stress and hormone treatments
Source: Frontiers journal article supplement (doi:10.3389/fpls.2023.1269200), 2023-11-21
Supplement: Data_Sheet_1.zip [file Data_Sheet_1.zip]

## Sheet: Cis-regulatory elements
Table S5-1 Cis-regulatory elements in the promoter region of peanut TGA in this study.
Transcript ID	Gene	Site Name	Sequence	Position	score	Strand Matrix	Organism	Function
arahy.Tifrunner.gnm2.ann1.5F9GBV.1	AhTGA12	3-AF1 binding site	TAAGAGAGGAA	74	10	+	Solanum tuberosum	light responsive element
arahy.Tifrunner.gnm2.ann1.P1JBJN.1	AhTGA11	3-AF1 binding site	TAAGAGAGGAA	820	10	+	Solanum tuberosum	light responsive element
arahy.Tifrunner.gnm2.ann1.R4ID1P.1	AhTGA01	3-AF1 binding site	TAAGAGAGGAA	120	10	+	Solanum tuberosum	light responsive element
arahy.Tifrunner.gnm2.ann1.661MCQ.1	AhTGA06	ABRE	ACGTG	208	5	-	Arabidopsis thaliana	cis-acting element involved in the abscisic acid responsiveness
arahy.Tifrunner.gnm2.ann1.661MCQ.1	AhTGA06	ABRE	CGTACGTGCA	283	9	+	Hordeum vulgare	cis-acting element involved in the abscisic acid responsiveness
arahy.Tifrunner.gnm2.ann1.6K442L.1	AhTGA14	ABRE	ACGTG	358	5	-	Arabidopsis thaliana	cis-acting element involved in the abscisic acid responsiveness
arahy.Tifrunner.gnm2.ann1.6K442L.1	AhTGA14	ABRE	ACGTG	574	5	+	Arabidopsis thaliana	cis-acting element involved in the abscisic acid responsiveness
arahy.Tifrunner.gnm2.ann1.6K442L.1	AhTGA14	ABRE	ACGTG	1372	5	+	Arabidopsis thaliana	cis-acting element involved in the abscisic acid responsiveness
arahy.Tifrunner.gnm2.ann1.6K442L.1	AhTGA14	ABRE	ACGTG	1467	5	-	Arabidopsis thaliana	cis-acting element involved in the abscisic acid responsiveness
arahy.Tifrunner.gnm2.ann1.H6GQLR.1	AhTGA15	ABRE	CGTACGTGCA	229	9	+	Hordeum vulgare	cis-acting element involved in the abscisic acid responsiveness
arahy.Tifrunner.gnm2.ann1.K04A4E.1	AhTGA19	ABRE	ACGTG	1844	5	+	Arabidopsis thaliana	cis-acting element involved in the abscisic acid responsiveness
arahy.Tifrunner.gnm2.ann1.P1JBJN.1	AhTGA11	ABRE	ACGTG	333	5	-	Arabidopsis thaliana	cis-acting element involved in the abscisic acid responsiveness
arahy.Tifrunner.gnm2.ann1.PHPT4F.1	AhTGA16	ABRE	ACGTG	59	5	+	Arabidopsis thaliana	cis-acting element involved in the abscisic acid responsiveness
arahy.Tifrunner.gnm2.ann1.RIV6ZB.1	AhTGA04	ABRE	ACGTG	348	5	-	Arabidopsis thaliana	cis-acting element involved in the abscisic acid responsiveness
arahy.Tifrunner.gnm2.ann1.RIV6ZB.1	AhTGA04	ABRE	ACGTG	564	5	+	Arabidopsis thaliana	cis-acting element involved in the abscisic acid responsiveness
arahy.Tifrunner.gnm2.ann1.RIV6ZB.1	AhTGA04	ABRE	CGCACGTGTC	1368	9	-	Hordeum vulgare	cis-acting element involved in the abscisic acid responsiveness
arahy.Tifrunner.gnm2.ann1.RIV6ZB.1	AhTGA04	ABRE	ACGTG	1371	5	+	Arabidopsis thaliana	cis-acting element involved in the abscisic acid responsiveness
arahy.Tifrunner.gnm2.ann1.RIV6ZB.1	AhTGA04	ABRE	ACGTG	1466	5	-	Arabidopsis thaliana	cis-acting element involved in the abscisic acid responsiveness
arahy.Tifrunner.gnm2.ann1.RKP385.1	AhTGA09	ABRE	ACGTG	117	5	+	Arabidopsis thaliana	cis-acting element involved in the abscisic acid responsiveness
arahy.Tifrunner.gnm2.ann1.5F9GBV.1	AhTGA12	ACE	CTAACGTATT	663	9	+	Petroselinum crispum	cis-acting element involved in light responsiveness
arahy.Tifrunner.gnm2.ann1.J1CFJJ.1	AhTGA08	ACE	CTAACGTATT	751	9	-	Petroselinum crispum	cis-acting element involved in light responsiveness
arahy.Tifrunner.gnm2.ann1.R4ID1P.1	AhTGA01	ACE	CTAACGTATT	719	9	+	Petroselinum crispum	cis-acting element involved in light responsiveness
arahy.Tifrunner.gnm2.ann1.R4ID1P.1	AhTGA01	ACE	CTAACGTATT	1633	9	-	Petroselinum crispum	cis-acting element involved in light responsiveness
arahy.Tifrunner.gnm2.ann1.5F9GBV.1	AhTGA12	AE-box	AGAAACTT	824	8	-	Arabidopsis thaliana	part of a module for light response
arahy.Tifrunner.gnm2.ann1.661MCQ.1	AhTGA06	AE-box	AGAAACAA	1931	8	+	Arabidopsis thaliana	part of a module for light response
arahy.Tifrunner.gnm2.ann1.AAI19J.1	AhTGA20	AE-box	AGAAACAA	918	8	-	Arabidopsis thaliana	part of a module for light response
arahy.Tifrunner.gnm2.ann1.H6GQLR.1	AhTGA15	AE-box	AGAAACAA	1947	8	+	Arabidopsis thaliana	part of a module for light response
arahy.Tifrunner.gnm2.ann1.P1JBJN.1	AhTGA11	AE-box	AGAAACTT	1527	8	-	Arabidopsis thaliana	part of a module for light response
arahy.Tifrunner.gnm2.ann1.R4ID1P.1	AhTGA01	AE-box	AGAAACTT	882	8	-	Arabidopsis thaliana	part of a module for light response
arahy.Tifrunner.gnm2.ann1.RKP385.1	AhTGA09	AE-box	AGAAACTT	1331	8	+	Arabidopsis thaliana	part of a module for light response
arahy.Tifrunner.gnm2.ann1.SERN02.1	AhTGA18	AE-box	AGAAACTT	1330	8	+	Arabidopsis thaliana	part of a module for light response
arahy.Tifrunner.gnm2.ann1.SERN02.1	AhTGA18	AE-box	AGAAACAA	1602	8	-	Arabidopsis thaliana	part of a module for light response
arahy.Tifrunner.gnm2.ann1.5F9GBV.1	AhTGA12	ARE	AAACCA	157	6	-	Zea mays	cis-acting regulatory element essential for the anaerobic induction
arahy.Tifrunner.gnm2.ann1.661MCQ.1	AhTGA06	ARE	AAACCA	374	6	-	Zea mays	cis-acting regulatory element essential for the anaerobic induction
arahy.Tifrunner.gnm2.ann1.661MCQ.1	AhTGA06	ARE	AAACCA	1049	6	+	Zea mays	cis-acting regulatory element essential for the anaerobic induction
arahy.Tifrunner.gnm2.ann1.6K442L.1	AhTGA14	ARE	AAACCA	1314	6	-	Zea mays	cis-acting regulatory element essential for the anaerobic induction
arahy.Tifrunner.gnm2.ann1.6K442L.1	AhTGA14	ARE	AAACCA	1354	6	-	Zea mays	cis-acting regulatory element essential for the anaerobic induction
arahy.Tifrunner.gnm2.ann1.6K442L.1	AhTGA14	ARE	AAACCA	1360	6	-	Zea mays	cis-acting regulatory element essential for the anaerobic induction
arahy.Tifrunner.gnm2.ann1.980X4K.1	AhTGA17	ARE	AAACCA	788	6	-	Zea mays	cis-acting regulatory element essential for the anaerobic induction
arahy.Tifrunner.gnm2.ann1.AAI19J.1	AhTGA20	ARE	AAACCA	1049	6	-	Zea mays	cis-acting regulatory element essential for the anaerobic induction
arahy.Tifrunner.gnm2.ann1.AAI19J.1	AhTGA20	ARE	AAACCA	1094	6	-	Zea mays	cis-acting regulatory element essential for the anaerobic induction
arahy.Tifrunner.gnm2.ann1.AAI19J.1	AhTGA20	ARE	AAACCA	1257	6	-	Zea mays	cis-acting regulatory element essential for the anaerobic induction
arahy.Tifrunner.gnm2.ann1.AAI19J.1	AhTGA20	ARE	AAACCA	1342	6	-	Zea mays	cis-acting regulatory element essential for the anaerobic induction
arahy.Tifrunner.gnm2.ann1.AAI19J.1	AhTGA20	ARE	AAACCA	1666	6	-	Zea mays	cis-acting regulatory element essential for the anaerobic induction
arahy.Tifrunner.gnm2.ann1.EH3L7F.1	AhTGA13	ARE	AAACCA	1979	6	-	Zea mays	cis-acting regulatory element essential for the anaerobic induction
arahy.Tifrunner.gnm2.ann1.H6GQLR.1	AhTGA15	ARE	AAACCA	1061	6	+	Zea mays	cis-acting regulatory element essential for the anaerobic induction
arahy.Tifrunner.gnm2.ann1.J1CFJJ.1	AhTGA08	ARE	AAACCA	50	6	+	Zea mays	cis-acting regulatory element essential for the anaerobic induction
arahy.Tifrunner.gnm2.ann1.J1CFJJ.1	AhTGA08	ARE	AAACCA	1256	6	-	Zea mays	cis-acting regulatory element essential for the anaerobic induction
arahy.Tifrunner.gnm2.ann1.K04A4E.1	AhTGA19	ARE	AAACCA	1396	6	-	Zea mays	cis-acting regulatory element essential for the anaerobic induction
arahy.Tifrunner.gnm2.ann1.K04A4E.1	AhTGA19	ARE	AAACCA	1579	6	+	Zea mays	cis-acting regulatory element essential for the anaerobic induction
arahy.Tifrunner.gnm2.ann1.KZ9VWQ.1	AhTGA07	ARE	AAACCA	1845	6	-	Zea mays	cis-acting regulatory element essential for the anaerobic induction
arahy.Tifrunner.gnm2.ann1.LTZY89.1	AhTGA02	ARE	AAACCA	1979	6	-	Zea mays	cis-acting regulatory element essential for the anaerobic induction
arahy.Tifrunner.gnm2.ann1.R4ID1P.1	AhTGA01	ARE	AAACCA	203	6	-	Zea mays	cis-acting regulatory element essential for the anaerobic induction
arahy.Tifrunner.gnm2.ann1.RIV6ZB.1	AhTGA04	ARE	AAACCA	1313	6	-	Zea mays	cis-acting regulatory element essential for the anaerobic induction
arahy.Tifrunner.gnm2.ann1.RIV6ZB.1	AhTGA04	ARE	AAACCA	1353	6	-	Zea mays	cis-acting regulatory element essential for the anaerobic induction
arahy.Tifrunner.gnm2.ann1.RIV6ZB.1	AhTGA04	ARE	AAACCA	1359	6	-	Zea mays	cis-acting regulatory element essential for the anaerobic induction
arahy.Tifrunner.gnm2.ann1.RKP385.1	AhTGA09	ARE	AAACCA	1194	6	-	Zea mays	cis-acting regulatory element essential for the anaerobic induction
arahy.Tifrunner.gnm2.ann1.RKP385.1	AhTGA09	ARE	AAACCA	1657	6	-	Zea mays	cis-acting regulatory element essential for the anaerobic induction
arahy.Tifrunner.gnm2.ann1.RKP385.1	AhTGA09	ARE	AAACCA	1901	6	+	Zea mays	cis-acting regulatory element essential for the anaerobic induction
arahy.Tifrunner.gnm2.ann1.S1DMKE.1	AhTGA03	ARE	AAACCA	1979	6	-	Zea mays	cis-acting regulatory element essential for the anaerobic induction
arahy.Tifrunner.gnm2.ann1.SERN02.1	AhTGA18	ARE	AAACCA	1657	6	-	Zea mays	cis-acting regulatory element essential for the anaerobic induction
arahy.Tifrunner.gnm2.ann1.SERN02.1	AhTGA18	ARE	AAACCA	1901	6	+	Zea mays	cis-acting regulatory element essential for the anaerobic induction
arahy.Tifrunner.gnm2.ann1.W15JJQ.1	AhTGA10	ARE	AAACCA	1578	6	+	Zea mays	cis-acting regulatory element essential for the anaerobic induction
arahy.Tifrunner.gnm2.ann1.W15JJQ.1	AhTGA10	ARE	AAACCA	1836	6	-	Zea mays	cis-acting regulatory element essential for the anaerobic induction
arahy.Tifrunner.gnm2.ann1.5F9GBV.1	AhTGA12	AT1-motif	AATTATTTTTTATT	871	13	+	Solanum tuberosum	part of a light responsive module
arahy.Tifrunner.gnm2.ann1.661MCQ.1	AhTGA06	AT1-motif	AATTATTTTTTATT	102	13	-	Solanum tuberosum	part of a light responsive module
arahy.Tifrunner.gnm2.ann1.J1CFJJ.1	AhTGA08	AT1-motif	AATTATTTTTTATT	1488	13	+	Solanum tuberosum	part of a light responsive module
arahy.Tifrunner.gnm2.ann1.LTZY89.1	AhTGA02	AT1-motif	AATTATTTTTTATT	1397	13	+	Solanum tuberosum	part of a light responsive module
arahy.Tifrunner.gnm2.ann1.R4ID1P.1	AhTGA01	AT1-motif	AATTATTTTTTATT	928	13	+	Solanum tuberosum	part of a light responsive module
arahy.Tifrunner.gnm2.ann1.R4ID1P.1	AhTGA01	AT1-motif	AATTATTTTTTATT	1052	13	-	Solanum tuberosum	part of a light responsive module
arahy.Tifrunner.gnm2.ann1.R4ID1P.1	AhTGA01	AT1-motif	AATTATTTTTTATT	1567	13	-	Solanum tuberosum	part of a light responsive module
arahy.Tifrunner.gnm2.ann1.S1DMKE.1	AhTGA03	AT1-motif	AATTATTTTTTATT	1397	13	+	Solanum tuberosum	part of a light responsive module
arahy.Tifrunner.gnm2.ann1.K04A4E.1	AhTGA19	ATC-motif	AGTAATCT	1484	8	-	Spinacia oleracea	part of a conserved DNA module involved in light responsiveness
arahy.Tifrunner.gnm2.ann1.P1JBJN.1	AhTGA11	ATC-motif	AGTAATCT	1078	8	-	Spinacia oleracea	part of a conserved DNA module involved in light responsiveness
arahy.Tifrunner.gnm2.ann1.661MCQ.1	AhTGA06	ATCT-motif	AATCTAATCC	251	9	+	Pisum sativum	part of a conserved DNA module involved in light responsiveness
arahy.Tifrunner.gnm2.ann1.KZ9VWQ.1	AhTGA07	ATCT-motif	AATCTAATCC	736	9	-	Pisum sativum	part of a conserved DNA module involved in light responsiveness
arahy.Tifrunner.gnm2.ann1.P1JBJN.1	AhTGA11	ATCT-motif	AATCTAATCC	559	9	+	Pisum sativum	part of a conserved DNA module involved in light responsiveness
arahy.Tifrunner.gnm2.ann1.EH3L7F.1	AhTGA13	AT-rich element	ATAGAAATCAA	862	10	+	Glycine max	binding site of AT-rich DNA binding protein (ATBP-1)
arahy.Tifrunner.gnm2.ann1.EH3L7F.1	AhTGA13	AT-rich element	ATAGAAATCAA	1177	10	+	Glycine max	binding site of AT-rich DNA binding protein (ATBP-1)
arahy.Tifrunner.gnm2.ann1.K04A4E.1	AhTGA19	AT-rich element	ATAGAAATCAA	1575	10	+	Glycine max	binding site of AT-rich DNA binding protein (ATBP-1)
arahy.Tifrunner.gnm2.ann1.W15JJQ.1	AhTGA10	AT-rich element	ATAGAAATCAA	1574	10	+	Glycine max	binding site of AT-rich DNA binding protein (ATBP-1)
arahy.Tifrunner.gnm2.ann1.980X4K.1	AhTGA17	AuxRE	TGTCTCAATAAG	1777	11	-	Glycine max	part of an auxin-responsive element
arahy.Tifrunner.gnm2.ann1.980X4K.1	AhTGA17	AuxRR-core	GGTCCAT	29	7	+	Nicotiana tabacum	cis-acting regulatory element involved in auxin responsiveness
arahy.Tifrunner.gnm2.ann1.J1CFJJ.1	AhTGA08	AuxRR-core	GGTCCAT	186	7	+	Nicotiana tabacum	cis-acting regulatory element involved in auxin responsiveness
arahy.Tifrunner.gnm2.ann1.KZ9VWQ.1	AhTGA07	AuxRR-core	GGTCCAT	528	7	-	Nicotiana tabacum	cis-acting regulatory element involved in auxin responsiveness
arahy.Tifrunner.gnm2.ann1.0GP62G.1	AhTGA05	Box 4	ATTAAT	348	6	+	Petroselinum crispum	part of a conserved DNA module involved in light responsiveness
arahy.Tifrunner.gnm2.ann1.0GP62G.1	AhTGA05	Box 4	ATTAAT	797	6	+	Petroselinum crispum	part of a conserved DNA module involved in light responsiveness
arahy.Tifrunner.gnm2.ann1.0GP62G.1	AhTGA05	Box 4	ATTAAT	810	6	+	Petroselinum crispum	part of a conserved DNA module involved in light responsiveness
arahy.Tifrunner.gnm2.ann1.5F9GBV.1	AhTGA12	Box 4	ATTAAT	256	6	+	Petroselinum crispum	part of a conserved DNA module involved in light responsiveness
arahy.Tifrunner.gnm2.ann1.5F9GBV.1	AhTGA12	Box 4	ATTAAT	481	6	+	Petroselinum crispum	part of a conserved DNA module involved in light responsiveness
arahy.Tifrunner.gnm2.ann1.5F9GBV.1	AhTGA12	Box 4	ATTAAT	614	6	+	Petroselinum crispum	part of a conserved DNA module involved in light responsiveness
arahy.Tifrunner.gnm2.ann1.5F9GBV.1	AhTGA12	Box 4	ATTAAT	1115	6	-	Petroselinum crispum	part of a conserved DNA module involved in light responsiveness
arahy.Tifrunner.gnm2.ann1.5F9GBV.1	AhTGA12	Box 4	ATTAAT	1417	6	-	Petroselinum crispum	part of a conserved DNA module involved in light responsiveness
arahy.Tifrunner.gnm2.ann1.5F9GBV.1	AhTGA12	Box 4	ATTAAT	1705	6	-	Petroselinum crispum	part of a conserved DNA module involved in light responsiveness
arahy.Tifrunner.gnm2.ann1.5F9GBV.1	AhTGA12	Box 4	ATTAAT	1768	6	-	Petroselinum crispum	part of a conserved DNA module involved in light responsiveness
arahy.Tifrunner.gnm2.ann1.661MCQ.1	AhTGA06	Box 4	ATTAAT	34	6	+	Petroselinum crispum	part of a conserved DNA module involved in light responsiveness
arahy.Tifrunner.gnm2.ann1.661MCQ.1	AhTGA06	Box 4	ATTAAT	113	6	+	Petroselinum crispum	part of a conserved DNA module involved in light responsiveness
arahy.Tifrunner.gnm2.ann1.661MCQ.1	AhTGA06	Box 4	ATTAAT	187	6	+	Petroselinum crispum	part of a conserved DNA module involved in light responsiveness
arahy.Tifrunner.gnm2.ann1.6K442L.1	AhTGA14	Box 4	ATTAAT	61	6	+	Petroselinum crispum	part of a conserved DNA module involved in light responsiveness
arahy.Tifrunner.gnm2.ann1.6K442L.1	AhTGA14	Box 4	ATTAAT	85	6	+	Petroselinum crispum	part of a conserved DNA module involved in light responsiveness
arahy.Tifrunner.gnm2.ann1.6K442L.1	AhTGA14	Box 4	ATTAAT	221	6	+	Petroselinum crispum	part of a conserved DNA module involved in light responsiveness
arahy.Tifrunner.gnm2.ann1.6K442L.1	AhTGA14	Box 4	ATTAAT	633	6	+	Petroselinum crispum	part of a conserved DNA module involved in light responsiveness
arahy.Tifrunner.gnm2.ann1.6K442L.1	AhTGA14	Box 4	ATTAAT	1685	6	-	Petroselinum crispum	part of a conserved DNA module involved in light responsiveness
arahy.Tifrunner.gnm2.ann1.980X4K.1	AhTGA17	Box 4	ATTAAT	425	6	+	Petroselinum crispum	part of a conserved DNA module involved in light responsiveness
arahy.Tifrunner.gnm2.ann1.980X4K.1	AhTGA17	Box 4	ATTAAT	465	6	+	Petroselinum crispum	part of a conserved DNA module involved in light responsiveness
arahy.Tifrunner.gnm2.ann1.980X4K.1	AhTGA17	Box 4	ATTAAT	508	6	+	Petroselinum crispum	part of a conserved DNA module involved in light responsiveness
arahy.Tifrunner.gnm2.ann1.980X4K.1	AhTGA17	Box 4	ATTAAT	1232	6	-	Petroselinum crispum	part of a conserved DNA module involved in light responsiveness
arahy.Tifrunner.gnm2.ann1.980X4K.1	AhTGA17	Box 4	ATTAAT	1544	6	-	Petroselinum crispum	part of a conserved DNA module involved in light responsiveness
arahy.Tifrunner.gnm2.ann1.980X4K.1	AhTGA17	Box 4	ATTAAT	1607	6	-	Petroselinum crispum	part of a conserved DNA module involved in light responsiveness
arahy.Tifrunner.gnm2.ann1.AAI19J.1	AhTGA20	Box 4	ATTAAT	65	6	+	Petroselinum crispum	part of a conserved DNA module involved in light responsiveness
arahy.Tifrunner.gnm2.ann1.AAI19J.1	AhTGA20	Box 4	ATTAAT	90	6	+	Petroselinum crispum	part of a conserved DNA module involved in light responsiveness
arahy.Tifrunner.gnm2.ann1.AAI19J.1	AhTGA20	Box 4	ATTAAT	238	6	+	Petroselinum crispum	part of a conserved DNA module involved in light responsiveness
arahy.Tifrunner.gnm2.ann1.AAI19J.1	AhTGA20	Box 4	ATTAAT	260	6	+	Petroselinum crispum	part of a conserved DNA module involved in light responsiveness
arahy.Tifrunner.gnm2.ann1.AAI19J.1	AhTGA20	Box 4	ATTAAT	292	6	+	Petroselinum crispum	part of a conserved DNA module involved in light responsiveness
arahy.Tifrunner.gnm2.ann1.AAI19J.1	AhTGA20	Box 4	ATTAAT	433	6	+	Petroselinum crispum	part of a conserved DNA module involved in light responsiveness
arahy.Tifrunner.gnm2.ann1.AAI19J.1	AhTGA20	Box 4	ATTAAT	1196	6	-	Petroselinum crispum	part of a conserved DNA module involved in light responsiveness
arahy.Tifrunner.gnm2.ann1.AAI19J.1	AhTGA20	Box 4	ATTAAT	1904	6	-	Petroselinum crispum	part of a conserved DNA module involved in light responsiveness
arahy.Tifrunner.gnm2.ann1.EH3L7F.1	AhTGA13	Box 4	ATTAAT	454	6	+	Petroselinum crispum	part of a conserved DNA module involved in light responsiveness
arahy.Tifrunner.gnm2.ann1.H6GQLR.1	AhTGA15	Box 4	ATTAAT	52	6	+	Petroselinum crispum	part of a conserved DNA module involved in light responsiveness
arahy.Tifrunner.gnm2.ann1.H6GQLR.1	AhTGA15	Box 4	ATTAAT	134	6	+	Petroselinum crispum	part of a conserved DNA module involved in light responsiveness
arahy.Tifrunner.gnm2.ann1.J1CFJJ.1	AhTGA08	Box 4	ATTAAT	771	6	+	Petroselinum crispum	part of a conserved DNA module involved in light responsiveness
arahy.Tifrunner.gnm2.ann1.J1CFJJ.1	AhTGA08	Box 4	ATTAAT	881	6	+	Petroselinum crispum	part of a conserved DNA module involved in light responsiveness
arahy.Tifrunner.gnm2.ann1.J1CFJJ.1	AhTGA08	Box 4	ATTAAT	973	6	+	Petroselinum crispum	part of a conserved DNA module involved in light responsiveness
arahy.Tifrunner.gnm2.ann1.J1CFJJ.1	AhTGA08	Box 4	ATTAAT	1033	6	-	Petroselinum crispum	part of a conserved DNA module involved in light responsiveness
arahy.Tifrunner.gnm2.ann1.J1CFJJ.1	AhTGA08	Box 4	ATTAAT	1707	6	-	Petroselinum crispum	part of a conserved DNA module involved in light responsiveness
arahy.Tifrunner.gnm2.ann1.K04A4E.1	AhTGA19	Box 4	ATTAAT	604	6	+	Petroselinum crispum	part of a conserved DNA module involved in light responsiveness
arahy.Tifrunner.gnm2.ann1.K04A4E.1	AhTGA19	Box 4	ATTAAT	1370	6	-	Petroselinum crispum	part of a conserved DNA module involved in light responsiveness
arahy.Tifrunner.gnm2.ann1.K04A4E.1	AhTGA19	Box 4	ATTAAT	1433	6	-	Petroselinum crispum	part of a conserved DNA module involved in light responsiveness
arahy.Tifrunner.gnm2.ann1.KZ9VWQ.1	AhTGA07	Box 4	ATTAAT	110	6	+	Petroselinum crispum	part of a conserved DNA module involved in light responsiveness
arahy.Tifrunner.gnm2.ann1.KZ9VWQ.1	AhTGA07	Box 4	ATTAAT	592	6	+	Petroselinum crispum	part of a conserved DNA module involved in light responsiveness
arahy.Tifrunner.gnm2.ann1.KZ9VWQ.1	AhTGA07	Box 4	ATTAAT	1034	6	-	Petroselinum crispum	part of a conserved DNA module involved in light responsiveness
arahy.Tifrunner.gnm2.ann1.KZ9VWQ.1	AhTGA07	Box 4	ATTAAT	1250	6	-	Petroselinum crispum	part of a conserved DNA module involved in light responsiveness
arahy.Tifrunner.gnm2.ann1.LTZY89.1	AhTGA02	Box 4	ATTAAT	122	6	+	Petroselinum crispum	part of a conserved DNA module involved in light responsiveness
arahy.Tifrunner.gnm2.ann1.LTZY89.1	AhTGA02	Box 4	ATTAAT	440	6	+	Petroselinum crispum	part of a conserved DNA module involved in light responsiveness
arahy.Tifrunner.gnm2.ann1.P1JBJN.1	AhTGA11	Box 4	ATTAAT	39	6	+	Petroselinum crispum	part of a conserved DNA module involved in light responsiveness
arahy.Tifrunner.gnm2.ann1.P1JBJN.1	AhTGA11	Box 4	ATTAAT	278	6	+	Petroselinum crispum	part of a conserved DNA module involved in light responsiveness
arahy.Tifrunner.gnm2.ann1.P1JBJN.1	AhTGA11	Box 4	ATTAAT	522	6	+	Petroselinum crispum	part of a conserved DNA module involved in light responsiveness
arahy.Tifrunner.gnm2.ann1.PHPT4F.1	AhTGA16	Box 4	ATTAAT	158	6	+	Petroselinum crispum	part of a conserved DNA module involved in light responsiveness
arahy.Tifrunner.gnm2.ann1.PHPT4F.1	AhTGA16	Box 4	ATTAAT	227	6	+	Petroselinum crispum	part of a conserved DNA module involved in light responsiveness
arahy.Tifrunner.gnm2.ann1.PHPT4F.1	AhTGA16	Box 4	ATTAAT	239	6	+	Petroselinum crispum	part of a conserved DNA module involved in light responsiveness
arahy.Tifrunner.gnm2.ann1.PHPT4F.1	AhTGA16	Box 4	ATTAAT	296	6	+	Petroselinum crispum	part of a conserved DNA module involved in light responsiveness
arahy.Tifrunner.gnm2.ann1.PHPT4F.1	AhTGA16	Box 4	ATTAAT	539	6	+	Petroselinum crispum	part of a conserved DNA module involved in light responsiveness
arahy.Tifrunner.gnm2.ann1.PHPT4F.1	AhTGA16	Box 4	ATTAAT	627	6	+	Petroselinum crispum	part of a conserved DNA module involved in light responsiveness
arahy.Tifrunner.gnm2.ann1.PHPT4F.1	AhTGA16	Box 4	ATTAAT	1254	6	-	Petroselinum crispum	part of a conserved DNA module involved in light responsiveness
arahy.Tifrunner.gnm2.ann1.R4ID1P.1	AhTGA01	Box 4	ATTAAT	307	6	+	Petroselinum crispum	part of a conserved DNA module involved in light responsiveness
arahy.Tifrunner.gnm2.ann1.R4ID1P.1	AhTGA01	Box 4	ATTAAT	539	6	+	Petroselinum crispum	part of a conserved DNA module involved in light responsiveness
arahy.Tifrunner.gnm2.ann1.R4ID1P.1	AhTGA01	Box 4	ATTAAT	670	6	+	Petroselinum crispum	part of a conserved DNA module involved in light responsiveness
arahy.Tifrunner.gnm2.ann1.R4ID1P.1	AhTGA01	Box 4	ATTAAT	1172	6	-	Petroselinum crispum	part of a conserved DNA module involved in light responsiveness
arahy.Tifrunner.gnm2.ann1.R4ID1P.1	AhTGA01	Box 4	ATTAAT	1681	6	-	Petroselinum crispum	part of a conserved DNA module involved in light responsiveness
arahy.Tifrunner.gnm2.ann1.R4ID1P.1	AhTGA01	Box 4	ATTAAT	1744	6	-	Petroselinum crispum	part of a conserved DNA module involved in light responsiveness
arahy.Tifrunner.gnm2.ann1.RIV6ZB.1	AhTGA04	Box 4	ATTAAT	623	6	+	Petroselinum crispum	part of a conserved DNA module involved in light responsiveness
arahy.Tifrunner.gnm2.ann1.RIV6ZB.1	AhTGA04	Box 4	ATTAAT	1684	6	-	Petroselinum crispum	part of a conserved DNA module involved in light responsiveness
arahy.Tifrunner.gnm2.ann1.RKP385.1	AhTGA09	Box 4	ATTAAT	293	6	+	Petroselinum crispum	part of a conserved DNA module involved in light responsiveness
arahy.Tifrunner.gnm2.ann1.S1DMKE.1	AhTGA03	Box 4	ATTAAT	122	6	+	Petroselinum crispum	part of a conserved DNA module involved in light responsiveness
arahy.Tifrunner.gnm2.ann1.S1DMKE.1	AhTGA03	Box 4	ATTAAT	440	6	+	Petroselinum crispum	part of a conserved DNA module involved in light responsiveness
arahy.Tifrunner.gnm2.ann1.SERN02.1	AhTGA18	Box 4	ATTAAT	1964	6	-	Petroselinum crispum	part of a conserved DNA module involved in light responsiveness
arahy.Tifrunner.gnm2.ann1.W15JJQ.1	AhTGA10	Box 4	ATTAAT	240	6	+	Petroselinum crispum	part of a conserved DNA module involved in light responsiveness
arahy.Tifrunner.gnm2.ann1.W15JJQ.1	AhTGA10	Box 4	ATTAAT	1395	6	-	Petroselinum crispum	part of a conserved DNA module involved in light responsiveness
arahy.Tifrunner.gnm2.ann1.W15JJQ.1	AhTGA10	Box 4	ATTAAT	1402	6	-	Petroselinum crispum	part of a conserved DNA module involved in light responsiveness
arahy.Tifrunner.gnm2.ann1.SERN02.1	AhTGA18	Box II	TGGTAATAA	1970	9	+	Solanum tuberosum	part of a light responsive element
arahy.Tifrunner.gnm2.ann1.0GP62G.1	AhTGA05	CAT-box	GCCACT	854	6	-	Arabidopsis thaliana	cis-acting regulatory element related to meristem expression
arahy.Tifrunner.gnm2.ann1.980X4K.1	AhTGA17	CAT-box	GCCACT	1596	6	-	Arabidopsis thaliana	cis-acting regulatory element related to meristem expression
arahy.Tifrunner.gnm2.ann1.AAI19J.1	AhTGA20	CAT-box	GCCACT	813	6	+	Arabidopsis thaliana	cis-acting regulatory element related to meristem expression
arahy.Tifrunner.gnm2.ann1.AAI19J.1	AhTGA20	CAT-box	GCCACT	1484	6	-	Arabidopsis thaliana	cis-acting regulatory element related to meristem expression
arahy.Tifrunner.gnm2.ann1.KZ9VWQ.1	AhTGA07	CAT-box	GCCACT	1350	6	+	Arabidopsis thaliana	cis-acting regulatory element related to meristem expression
arahy.Tifrunner.gnm2.ann1.PHPT4F.1	AhTGA16	CAT-box	GCCACT	1354	6	+	Arabidopsis thaliana	cis-acting regulatory element related to meristem expression
arahy.Tifrunner.gnm2.ann1.661MCQ.1	AhTGA06	CCAAT-box	CAACGG	1528	6	-	Hordeum vulgare	MYBHv1 binding site
arahy.Tifrunner.gnm2.ann1.H6GQLR.1	AhTGA15	CCAAT-box	CAACGG	1547	6	-	Hordeum vulgare	MYBHv1 binding site
arahy.Tifrunner.gnm2.ann1.0GP62G.1	AhTGA05	CGTCA-motif	CGTCA	528	5	-	Hordeum vulgare	cis-acting regulatory element involved in the MeJA-responsiveness
arahy.Tifrunner.gnm2.ann1.661MCQ.1	AhTGA06	CGTCA-motif	CGTCA	423	5	+	Hordeum vulgare	cis-acting regulatory element involved in the MeJA-responsiveness
arahy.Tifrunner.gnm2.ann1.661MCQ.1	AhTGA06	CGTCA-motif	CGTCA	1907	5	-	Hordeum vulgare	cis-acting regulatory element involved in the MeJA-responsiveness
arahy.Tifrunner.gnm2.ann1.6K442L.1	AhTGA14	CGTCA-motif	CGTCA	360	5	+	Hordeum vulgare	cis-acting regulatory element involved in the MeJA-responsiveness
arahy.Tifrunner.gnm2.ann1.6K442L.1	AhTGA14	CGTCA-motif	CGTCA	405	5	+	Hordeum vulgare	cis-acting regulatory element involved in the MeJA-responsiveness
arahy.Tifrunner.gnm2.ann1.6K442L.1	AhTGA14	CGTCA-motif	CGTCA	549	5	-	Hordeum vulgare	cis-acting regulatory element involved in the MeJA-responsiveness
arahy.Tifrunner.gnm2.ann1.6K442L.1	AhTGA14	CGTCA-motif	CGTCA	552	5	+	Hordeum vulgare	cis-acting regulatory element involved in the MeJA-responsiveness
arahy.Tifrunner.gnm2.ann1.H6GQLR.1	AhTGA15	CGTCA-motif	CGTCA	1923	5	-	Hordeum vulgare	cis-acting regulatory element involved in the MeJA-responsiveness
arahy.Tifrunner.gnm2.ann1.J1CFJJ.1	AhTGA08	CGTCA-motif	CGTCA	980	5	-	Hordeum vulgare	cis-acting regulatory element involved in the MeJA-responsiveness
arahy.Tifrunner.gnm2.ann1.KZ9VWQ.1	AhTGA07	CGTCA-motif	CGTCA	946	5	+	Hordeum vulgare	cis-acting regulatory element involved in the MeJA-responsiveness
arahy.Tifrunner.gnm2.ann1.KZ9VWQ.1	AhTGA07	CGTCA-motif	CGTCA	1341	5	+	Hordeum vulgare	cis-acting regulatory element involved in the MeJA-responsiveness
arahy.Tifrunner.gnm2.ann1.P1JBJN.1	AhTGA11	CGTCA-motif	CGTCA	335	5	+	Hordeum vulgare	cis-acting regulatory element involved in the MeJA-responsiveness
arahy.Tifrunner.gnm2.ann1.P1JBJN.1	AhTGA11	CGTCA-motif	CGTCA	643	5	+	Hordeum vulgare	cis-acting regulatory element involved in the MeJA-responsiveness
arahy.Tifrunner.gnm2.ann1.P1JBJN.1	AhTGA11	CGTCA-motif	CGTCA	1268	5	-	Hordeum vulgare	cis-acting regulatory element involved in the MeJA-responsiveness
arahy.Tifrunner.gnm2.ann1.P1JBJN.1	AhTGA11	CGTCA-motif	CGTCA	1505	5	+	Hordeum vulgare	cis-acting regulatory element involved in the MeJA-responsiveness
arahy.Tifrunner.gnm2.ann1.PHPT4F.1	AhTGA16	CGTCA-motif	CGTCA	948	5	+	Hordeum vulgare	cis-acting regulatory element involved in the MeJA-responsiveness
arahy.Tifrunner.gnm2.ann1.PHPT4F.1	AhTGA16	CGTCA-motif	CGTCA	1345	5	+	Hordeum vulgare	cis-acting regulatory element involved in the MeJA-responsiveness
arahy.Tifrunner.gnm2.ann1.RIV6ZB.1	AhTGA04	CGTCA-motif	CGTCA	350	5	+	Hordeum vulgare	cis-acting regulatory element involved in the MeJA-responsiveness
arahy.Tifrunner.gnm2.ann1.RIV6ZB.1	AhTGA04	CGTCA-motif	CGTCA	395	5	+	Hordeum vulgare	cis-acting regulatory element involved in the MeJA-responsiveness
arahy.Tifrunner.gnm2.ann1.RIV6ZB.1	AhTGA04	CGTCA-motif	CGTCA	539	5	-	Hordeum vulgare	cis-acting regulatory element involved in the MeJA-responsiveness
arahy.Tifrunner.gnm2.ann1.RIV6ZB.1	AhTGA04	CGTCA-motif	CGTCA	542	5	+	Hordeum vulgare	cis-acting regulatory element involved in the MeJA-responsiveness
arahy.Tifrunner.gnm2.ann1.AAI19J.1	AhTGA20	chs-CMA1a	TTACTTAA	143	8	-	Daucus carota	part of a light responsive element
arahy.Tifrunner.gnm2.ann1.P1JBJN.1	AhTGA11	chs-CMA1a	TTACTTAA	226	8	-	Daucus carota	part of a light responsive element
arahy.Tifrunner.gnm2.ann1.RKP385.1	AhTGA09	chs-CMA1a	TTACTTAA	239	8	-	Daucus carota	part of a light responsive element
arahy.Tifrunner.gnm2.ann1.RKP385.1	AhTGA09	chs-CMA1a	TTACTTAA	1484	8	-	Daucus carota	part of a light responsive element
arahy.Tifrunner.gnm2.ann1.6K442L.1	AhTGA14	circadian	CAAAGATATC	325	9	+	Lycopersicon esculentum	cis-acting regulatory element involved in circadian control
arahy.Tifrunner.gnm2.ann1.RIV6ZB.1	AhTGA04	circadian	CAAAGATATC	317	9	+	Lycopersicon esculentum	cis-acting regulatory element involved in circadian control
arahy.Tifrunner.gnm2.ann1.5F9GBV.1	AhTGA12	GA-motif	ATAGATAA	1522	8	+	Arabidopsis thaliana	part of a light responsive element
arahy.Tifrunner.gnm2.ann1.J1CFJJ.1	AhTGA08	GA-motif	ATAGATAA	1044	8	+	Arabidopsis thaliana	part of a light responsive element
arahy.Tifrunner.gnm2.ann1.RKP385.1	AhTGA09	GA-motif	ATAGATAA	287	8	-	Arabidopsis thaliana	part of a light responsive element
arahy.Tifrunner.gnm2.ann1.6K442L.1	AhTGA14	Gap-box	CAAATGAA(A/G)A	1698	9.5	-	Arabidopsis thaliana	part of a light responsive element
arahy.Tifrunner.gnm2.ann1.RIV6ZB.1	AhTGA04	Gap-box	CAAATGAA(A/G)A	1697	9.5	-	Arabidopsis thaliana	part of a light responsive element
arahy.Tifrunner.gnm2.ann1.W15JJQ.1	AhTGA10	Gap-box	CAAATGAA(A/G)A	833	9	-	Arabidopsis thaliana	part of a light responsive element
arahy.Tifrunner.gnm2.ann1.0GP62G.1	AhTGA05	GARE-motif	TCTGTTG	951	7	-	Brassica oleracea	gibberellin-responsive element
arahy.Tifrunner.gnm2.ann1.6K442L.1	AhTGA14	GARE-motif	TCTGTTG	1455	7	+	Brassica oleracea	gibberellin-responsive element
arahy.Tifrunner.gnm2.ann1.RIV6ZB.1	AhTGA04	GARE-motif	TCTGTTG	1454	7	+	Brassica oleracea	gibberellin-responsive element
arahy.Tifrunner.gnm2.ann1.RKP385.1	AhTGA09	GARE-motif	TCTGTTG	908	7	+	Brassica oleracea	gibberellin-responsive element
arahy.Tifrunner.gnm2.ann1.SERN02.1	AhTGA18	GARE-motif	TCTGTTG	912	7	+	Brassica oleracea	gibberellin-responsive element
arahy.Tifrunner.gnm2.ann1.EH3L7F.1	AhTGA13	GATA-motif	GATAGGG	549	7	+	Pisum sativum	part of a light responsive element
arahy.Tifrunner.gnm2.ann1.EH3L7F.1	AhTGA13	GATA-motif	GATAGGG	961	7	-	Pisum sativum	part of a light responsive element
arahy.Tifrunner.gnm2.ann1.EH3L7F.1	AhTGA13	GATA-motif	GATAGGA	1360	7	-	Arabidopsis thaliana	part of a light responsive element
arahy.Tifrunner.gnm2.ann1.KZ9VWQ.1	AhTGA07	GATA-motif	AAGATAAGATT	1965	10	+	Arabidopsis thaliana	part of a light responsive element
arahy.Tifrunner.gnm2.ann1.LTZY89.1	AhTGA02	GATA-motif	GATAGGG	535	7	+	Pisum sativum	part of a light responsive element
arahy.Tifrunner.gnm2.ann1.LTZY89.1	AhTGA02	GATA-motif	GATAGGA	1359	7	-	Arabidopsis thaliana	part of a light responsive element
arahy.Tifrunner.gnm2.ann1.P1JBJN.1	AhTGA11	GATA-motif	GATAGGG	761	7	+	Pisum sativum	part of a light responsive element
arahy.Tifrunner.gnm2.ann1.PHPT4F.1	AhTGA16	GATA-motif	GATAGGG	109	7	-	Pisum sativum	part of a light responsive element
arahy.Tifrunner.gnm2.ann1.S1DMKE.1	AhTGA03	GATA-motif	GATAGGG	535	7	+	Pisum sativum	part of a light responsive element
arahy.Tifrunner.gnm2.ann1.S1DMKE.1	AhTGA03	GATA-motif	GATAGGA	1359	7	-	Arabidopsis thaliana	part of a light responsive element
arahy.Tifrunner.gnm2.ann1.661MCQ.1	AhTGA06	G-box	TACGTG	208	6	-	Arabidopsis thaliana	cis-acting regulatory element involved in light responsiveness
arahy.Tifrunner.gnm2.ann1.6K442L.1	AhTGA14	G-Box	CACGTT	1371	6	-	Pisum sativum	cis-acting regulatory element involved in light responsiveness
arahy.Tifrunner.gnm2.ann1.6K442L.1	AhTGA14	G-Box	CACGTT	1467	6	+	Pisum sativum	cis-acting regulatory element involved in light responsiveness
arahy.Tifrunner.gnm2.ann1.6K442L.1	AhTGA14	G-box	CACGTC	358	6	+	Zea mays	cis-acting regulatory element involved in light responsiveness
arahy.Tifrunner.gnm2.ann1.6K442L.1	AhTGA14	G-box	CACGAC	491	6	-	Zea mays	cis-acting regulatory element involved in light responsiveness
arahy.Tifrunner.gnm2.ann1.6K442L.1	AhTGA14	G-box	GCCACGTGGA	571	9	-	Arabidopsis thaliana	cis-acting regulatory element involved in light responsiveness
arahy.Tifrunner.gnm2.ann1.6K442L.1	AhTGA14	G-box	TACGTG	573	6	+	Arabidopsis thaliana	cis-acting regulatory element involved in light responsiveness
arahy.Tifrunner.gnm2.ann1.H6GQLR.1	AhTGA15	G-box	CACGAC	1255	6	+	Zea mays	cis-acting regulatory element involved in light responsiveness
arahy.Tifrunner.gnm2.ann1.K04A4E.1	AhTGA19	G-Box	CACGTT	1843	6	-	Pisum sativum	cis-acting regulatory element involved in light responsiveness
arahy.Tifrunner.gnm2.ann1.P1JBJN.1	AhTGA11	G-box	CACGTC	333	6	+	Zea mays	cis-acting regulatory element involved in light responsiveness
arahy.Tifrunner.gnm2.ann1.PHPT4F.1	AhTGA16	G-box	TACGTG	58	6	+	Arabidopsis thaliana	cis-acting regulatory element involved in light responsiveness
arahy.Tifrunner.gnm2.ann1.RIV6ZB.1	AhTGA04	G-Box	CACGTT	1370	6	-	Pisum sativum	cis-acting regulatory element involved in light responsiveness
arahy.Tifrunner.gnm2.ann1.RIV6ZB.1	AhTGA04	G-Box	CACGTT	1466	6	+	Pisum sativum	cis-acting regulatory element involved in light responsiveness
arahy.Tifrunner.gnm2.ann1.RIV6ZB.1	AhTGA04	G-box	CACGTC	348	6	+	Zea mays	cis-acting regulatory element involved in light responsiveness
arahy.Tifrunner.gnm2.ann1.RIV6ZB.1	AhTGA04	G-box	CACGAC	481	6	-	Zea mays	cis-acting regulatory element involved in light responsiveness
arahy.Tifrunner.gnm2.ann1.RIV6ZB.1	AhTGA04	G-box	GCCACGTGGA	561	9	-	Arabidopsis thaliana	cis-acting regulatory element involved in light responsiveness
arahy.Tifrunner.gnm2.ann1.RIV6ZB.1	AhTGA04	G-box	TACGTG	563	6	+	Arabidopsis thaliana	cis-acting regulatory element involved in light responsiveness
arahy.Tifrunner.gnm2.ann1.RKP385.1	AhTGA09	G-box	TACGTG	116	6	+	Arabidopsis thaliana	cis-acting regulatory element involved in light responsiveness
arahy.Tifrunner.gnm2.ann1.0GP62G.1	AhTGA05	GCN4_motif	TGAGTCA	45	7	+	Oryza sativa	cis-regulatory element involved in endosperm expression
arahy.Tifrunner.gnm2.ann1.980X4K.1	AhTGA17	GCN4_motif	TGAGTCA	818	7	-	Oryza sativa	cis-regulatory element involved in endosperm expression
arahy.Tifrunner.gnm2.ann1.AAI19J.1	AhTGA20	GCN4_motif	TGAGTCA	625	7	+	Oryza sativa	cis-regulatory element involved in endosperm expression
arahy.Tifrunner.gnm2.ann1.J1CFJJ.1	AhTGA08	GCN4_motif	TGAGTCA	1286	7	-	Oryza sativa	cis-regulatory element involved in endosperm expression
arahy.Tifrunner.gnm2.ann1.0GP62G.1	AhTGA05	GT1-motif	GGTTAA	774	6	-	Arabidopsis thaliana	light responsive element
arahy.Tifrunner.gnm2.ann1.6K442L.1	AhTGA14	GT1-motif	GGTTAAT	1520	7	+	Avena sativa	light responsive element
arahy.Tifrunner.gnm2.ann1.AAI19J.1	AhTGA20	GT1-motif	GGTTAA	1208	6	+	Arabidopsis thaliana	light responsive element
arahy.Tifrunner.gnm2.ann1.EH3L7F.1	AhTGA13	GT1-motif	GGTTAA	651	6	+	Arabidopsis thaliana	light responsive element
arahy.Tifrunner.gnm2.ann1.H6GQLR.1	AhTGA15	GT1-motif	GGTTAA	14	6	-	Arabidopsis thaliana	light responsive element
arahy.Tifrunner.gnm2.ann1.H6GQLR.1	AhTGA15	GT1-motif	GGTTAA	60	6	-	Arabidopsis thaliana	light responsive element
arahy.Tifrunner.gnm2.ann1.K04A4E.1	AhTGA19	GT1-motif	GGTTAA	1560	6	-	Arabidopsis thaliana	light responsive element
arahy.Tifrunner.gnm2.ann1.KZ9VWQ.1	AhTGA07	GT1-motif	GTGTGTGAA	130	9	-	Solanum tuberosum	light responsive element
arahy.Tifrunner.gnm2.ann1.KZ9VWQ.1	AhTGA07	GT1-motif	GGTTAA	1219	6	+	Arabidopsis thaliana	light responsive element
arahy.Tifrunner.gnm2.ann1.LTZY89.1	AhTGA02	GT1-motif	GGTTAA	637	6	+	Arabidopsis thaliana	light responsive element
arahy.Tifrunner.gnm2.ann1.P1JBJN.1	AhTGA11	GT1-motif	GGTTAA	743	6	+	Arabidopsis thaliana	light responsive element
arahy.Tifrunner.gnm2.ann1.P1JBJN.1	AhTGA11	GT1-motif	GGTTAAT	1764	7	+	Avena sativa	light responsive element
arahy.Tifrunner.gnm2.ann1.PHPT4F.1	AhTGA16	GT1-motif	GGTTAA	480	6	-	Arabidopsis thaliana	light responsive element
arahy.Tifrunner.gnm2.ann1.PHPT4F.1	AhTGA16	GT1-motif	GGTTAA	1223	6	+	Arabidopsis thaliana	light responsive element
arahy.Tifrunner.gnm2.ann1.RIV6ZB.1	AhTGA04	GT1-motif	GGTTAAT	1519	7	+	Avena sativa	light responsive element
arahy.Tifrunner.gnm2.ann1.RKP385.1	AhTGA09	GT1-motif	GGTTAAT	1811	7	+	Avena sativa	light responsive element
arahy.Tifrunner.gnm2.ann1.S1DMKE.1	AhTGA03	GT1-motif	GGTTAA	637	6	+	Arabidopsis thaliana	light responsive element
arahy.Tifrunner.gnm2.ann1.6K442L.1	AhTGA14	GTGGC-motif	GATTCTGTGGC	1452	10	+	Spinacia oleracea	part of a light responsive element
arahy.Tifrunner.gnm2.ann1.RIV6ZB.1	AhTGA04	GTGGC-motif	GATTCTGTGGC	1451	10	+	Spinacia oleracea	part of a light responsive element
arahy.Tifrunner.gnm2.ann1.6K442L.1	AhTGA14	I-box	AGATAAGG	1408	8	-	Triticum aestivum	part of a light responsive element
arahy.Tifrunner.gnm2.ann1.980X4K.1	AhTGA17	I-box	AGATAAGG	293	8	+	Triticum aestivum	part of a light responsive element
arahy.Tifrunner.gnm2.ann1.EH3L7F.1	AhTGA13	I-box	cCATATCCAAT	273	10	-	Flaveria trinervia	part of a light responsive element
arahy.Tifrunner.gnm2.ann1.EH3L7F.1	AhTGA13	I-box	atGATAAGGTC	476	10	+	Helianthus annuus	part of a light responsive element
arahy.Tifrunner.gnm2.ann1.EH3L7F.1	AhTGA13	I-box	gGATAAGGTG	477	9	+	Zea mays	part of a light responsive element
arahy.Tifrunner.gnm2.ann1.H6GQLR.1	AhTGA15	I-box	TGATAATGT	1588	9	+	Solanum tuberosum	part of a light responsive element
arahy.Tifrunner.gnm2.ann1.J1CFJJ.1	AhTGA08	I-box	AGATAAGG	449	8	+	Triticum aestivum	part of a light responsive element
arahy.Tifrunner.gnm2.ann1.LTZY89.1	AhTGA02	I-box	cCATATCCAAT	264	10	-	Flaveria trinervia	part of a light responsive element
arahy.Tifrunner.gnm2.ann1.LTZY89.1	AhTGA02	I-box	atGATAAGGTC	462	10	+	Helianthus annuus	part of a light responsive element
arahy.Tifrunner.gnm2.ann1.LTZY89.1	AhTGA02	I-box	gGATAAGGTG	463	9	+	Zea mays	part of a light responsive element
arahy.Tifrunner.gnm2.ann1.RIV6ZB.1	AhTGA04	I-box	AGATAAGG	1407	8	-	Triticum aestivum	part of a light responsive element
arahy.Tifrunner.gnm2.ann1.RKP385.1	AhTGA09	I-box	gGATAAGGTG	1754	10	+	Zea mays	part of a light responsive element
arahy.Tifrunner.gnm2.ann1.S1DMKE.1	AhTGA03	I-box	cCATATCCAAT	264	10	-	Flaveria trinervia	part of a light responsive element
arahy.Tifrunner.gnm2.ann1.S1DMKE.1	AhTGA03	I-box	atGATAAGGTC	462	10	+	Helianthus annuus	part of a light responsive element
arahy.Tifrunner.gnm2.ann1.S1DMKE.1	AhTGA03	I-box	gGATAAGGTG	463	9	+	Zea mays	part of a light responsive element
arahy.Tifrunner.gnm2.ann1.SERN02.1	AhTGA18	I-box	gGATAAGGTG	1754	10	+	Zea mays	part of a light responsive element
arahy.Tifrunner.gnm2.ann1.0GP62G.1	AhTGA05	LAMP-element	CTTTATCA	1379	8	+	Pisum sativum	part of a light responsive element
arahy.Tifrunner.gnm2.ann1.980X4K.1	AhTGA17	LAMP-element	CTTTATCA	981	8	+	Pisum sativum	part of a light responsive element
arahy.Tifrunner.gnm2.ann1.EH3L7F.1	AhTGA13	LAMP-element	CTTTATCA	107	8	+	Pisum sativum	part of a light responsive element
arahy.Tifrunner.gnm2.ann1.EH3L7F.1	AhTGA13	LAMP-element	CTTTATCA	1548	8	-	Pisum sativum	part of a light responsive element
arahy.Tifrunner.gnm2.ann1.J1CFJJ.1	AhTGA08	LAMP-element	CTTTATCA	1449	8	+	Pisum sativum	part of a light responsive element
arahy.Tifrunner.gnm2.ann1.LTZY89.1	AhTGA02	LAMP-element	CTTTATCA	98	8	+	Pisum sativum	part of a light responsive element
arahy.Tifrunner.gnm2.ann1.LTZY89.1	AhTGA02	LAMP-element	CTTTATCA	1547	8	-	Pisum sativum	part of a light responsive element
arahy.Tifrunner.gnm2.ann1.RKP385.1	AhTGA09	LAMP-element	CCTTATCCA	1753	9	-	Spinacia oleracea	part of a light responsive element
arahy.Tifrunner.gnm2.ann1.S1DMKE.1	AhTGA03	LAMP-element	CTTTATCA	98	8	+	Pisum sativum	part of a light responsive element
arahy.Tifrunner.gnm2.ann1.S1DMKE.1	AhTGA03	LAMP-element	CTTTATCA	1546	8	-	Pisum sativum	part of a light responsive element
arahy.Tifrunner.gnm2.ann1.SERN02.1	AhTGA18	LAMP-element	CCTTATCCA	1753	9	-	Spinacia oleracea	part of a light responsive element
arahy.Tifrunner.gnm2.ann1.0GP62G.1	AhTGA05	LTR	CCGAAA	1698	6	+	Hordeum vulgare	cis-acting element involved in low-temperature responsiveness
arahy.Tifrunner.gnm2.ann1.5F9GBV.1	AhTGA12	LTR	CCGAAA	1142	6	+	Hordeum vulgare	cis-acting element involved in low-temperature responsiveness
arahy.Tifrunner.gnm2.ann1.661MCQ.1	AhTGA06	LTR	CCGAAA	518	6	-	Hordeum vulgare	cis-acting element involved in low-temperature responsiveness
arahy.Tifrunner.gnm2.ann1.661MCQ.1	AhTGA06	LTR	CCGAAA	1862	6	+	Hordeum vulgare	cis-acting element involved in low-temperature responsiveness
arahy.Tifrunner.gnm2.ann1.6K442L.1	AhTGA14	LTR	CCGAAA	1153	6	-	Hordeum vulgare	cis-acting element involved in low-temperature responsiveness
arahy.Tifrunner.gnm2.ann1.6K442L.1	AhTGA14	LTR	CCGAAA	1367	6	+	Hordeum vulgare	cis-acting element involved in low-temperature responsiveness
arahy.Tifrunner.gnm2.ann1.EH3L7F.1	AhTGA13	LTR	CCGAAA	66	6	+	Hordeum vulgare	cis-acting element involved in low-temperature responsiveness
arahy.Tifrunner.gnm2.ann1.EH3L7F.1	AhTGA13	LTR	CCGAAA	1661	6	+	Hordeum vulgare	cis-acting element involved in low-temperature responsiveness
arahy.Tifrunner.gnm2.ann1.H6GQLR.1	AhTGA15	LTR	CCGAAA	464	6	-	Hordeum vulgare	cis-acting element involved in low-temperature responsiveness
arahy.Tifrunner.gnm2.ann1.H6GQLR.1	AhTGA15	LTR	CCGAAA	1875	6	+	Hordeum vulgare	cis-acting element involved in low-temperature responsiveness
arahy.Tifrunner.gnm2.ann1.KZ9VWQ.1	AhTGA07	LTR	CCGAAA	464	6	-	Hordeum vulgare	cis-acting element involved in low-temperature responsiveness
arahy.Tifrunner.gnm2.ann1.KZ9VWQ.1	AhTGA07	LTR	CCGAAA	1094	6	+	Hordeum vulgare	cis-acting element involved in low-temperature responsiveness
arahy.Tifrunner.gnm2.ann1.LTZY89.1	AhTGA02	LTR	CCGAAA	58	6	+	Hordeum vulgare	cis-acting element involved in low-temperature responsiveness
arahy.Tifrunner.gnm2.ann1.LTZY89.1	AhTGA02	LTR	CCGAAA	1660	6	+	Hordeum vulgare	cis-acting element involved in low-temperature responsiveness
arahy.Tifrunner.gnm2.ann1.PHPT4F.1	AhTGA16	LTR	CCGAAA	1098	6	+	Hordeum vulgare	cis-acting element involved in low-temperature responsiveness
arahy.Tifrunner.gnm2.ann1.R4ID1P.1	AhTGA01	LTR	CCGAAA	1199	6	+	Hordeum vulgare	cis-acting element involved in low-temperature responsiveness
arahy.Tifrunner.gnm2.ann1.R4ID1P.1	AhTGA01	LTR	CCGAAA	1257	6	+	Hordeum vulgare	cis-acting element involved in low-temperature responsiveness
arahy.Tifrunner.gnm2.ann1.RIV6ZB.1	AhTGA04	LTR	CCGAAA	1153	6	-	Hordeum vulgare	cis-acting element involved in low-temperature responsiveness
arahy.Tifrunner.gnm2.ann1.RIV6ZB.1	AhTGA04	LTR	CCGAAA	1366	6	+	Hordeum vulgare	cis-acting element involved in low-temperature responsiveness
arahy.Tifrunner.gnm2.ann1.S1DMKE.1	AhTGA03	LTR	CCGAAA	57	6	+	Hordeum vulgare	cis-acting element involved in low-temperature responsiveness
arahy.Tifrunner.gnm2.ann1.S1DMKE.1	AhTGA03	LTR	CCGAAA	1659	6	+	Hordeum vulgare	cis-acting element involved in low-temperature responsiveness
arahy.Tifrunner.gnm2.ann1.6K442L.1	AhTGA14	MBS	CAACTG	1969	6	+	Arabidopsis thaliana	MYB binding site involved in drought-inducibility
arahy.Tifrunner.gnm2.ann1.H6GQLR.1	AhTGA15	MBS	CAACTG	1392	6	-	Arabidopsis thaliana	MYB binding site involved in drought-inducibility
arahy.Tifrunner.gnm2.ann1.K04A4E.1	AhTGA19	MBS	CAACTG	36	6	+	Arabidopsis thaliana	MYB binding site involved in drought-inducibility
arahy.Tifrunner.gnm2.ann1.P1JBJN.1	AhTGA11	MBS	CAACTG	116	6	+	Arabidopsis thaliana	MYB binding site involved in drought-inducibility
arahy.Tifrunner.gnm2.ann1.P1JBJN.1	AhTGA11	MBS	CAACTG	1886	6	+	Arabidopsis thaliana	MYB binding site involved in drought-inducibility
arahy.Tifrunner.gnm2.ann1.RIV6ZB.1	AhTGA04	MBS	CAACTG	1969	6	+	Arabidopsis thaliana	MYB binding site involved in drought-inducibility
arahy.Tifrunner.gnm2.ann1.RKP385.1	AhTGA09	MBS	CAACTG	938	6	-	Arabidopsis thaliana	MYB binding site involved in drought-inducibility
arahy.Tifrunner.gnm2.ann1.RKP385.1	AhTGA09	MBS	CAACTG	970	6	-	Arabidopsis thaliana	MYB binding site involved in drought-inducibility
arahy.Tifrunner.gnm2.ann1.SERN02.1	AhTGA18	MBS	CAACTG	942	6	-	Arabidopsis thaliana	MYB binding site involved in drought-inducibility
arahy.Tifrunner.gnm2.ann1.SERN02.1	AhTGA18	MBS	CAACTG	974	6	-	Arabidopsis thaliana	MYB binding site involved in drought-inducibility
arahy.Tifrunner.gnm2.ann1.W15JJQ.1	AhTGA10	MBS	CAACTG	319	6	+	Arabidopsis thaliana	MYB binding site involved in drought-inducibility
arahy.Tifrunner.gnm2.ann1.661MCQ.1	AhTGA06	MBSI	aaaAaaC(G/C)GTTA	1522	10.5	+	Petunia hybrida	MYB binding site involved in flavonoid biosynthetic genes regulation
arahy.Tifrunner.gnm2.ann1.KZ9VWQ.1	AhTGA07	MBSI	aaaAaaC(G/C)GTTA	824	10.5	+	Petunia hybrida	MYB binding site involved in flavonoid biosynthetic genes regulation
arahy.Tifrunner.gnm2.ann1.0GP62G.1	AhTGA05	MRE	AACCTAA	924	7	+	Petroselinum crispum	MYB binding site involved in light responsiveness
arahy.Tifrunner.gnm2.ann1.AAI19J.1	AhTGA20	MRE	AACCTAA	688	7	-	Petroselinum crispum	MYB binding site involved in light responsiveness
arahy.Tifrunner.gnm2.ann1.EH3L7F.1	AhTGA13	MRE	AACCTAA	648	7	-	Petroselinum crispum	MYB binding site involved in light responsiveness
arahy.Tifrunner.gnm2.ann1.LTZY89.1	AhTGA02	MRE	AACCTAA	634	7	-	Petroselinum crispum	MYB binding site involved in light responsiveness
arahy.Tifrunner.gnm2.ann1.P1JBJN.1	AhTGA11	MRE	AACCTAA	1853	7	-	Petroselinum crispum	MYB binding site involved in light responsiveness
arahy.Tifrunner.gnm2.ann1.R4ID1P.1	AhTGA01	MRE	AACCTAA	154	7	+	Petroselinum crispum	MYB binding site involved in light responsiveness
arahy.Tifrunner.gnm2.ann1.RKP385.1	AhTGA09	MRE	AACCTAA	1240	7	-	Petroselinum crispum	MYB binding site involved in light responsiveness
arahy.Tifrunner.gnm2.ann1.S1DMKE.1	AhTGA03	MRE	AACCTAA	634	7	-	Petroselinum crispum	MYB binding site involved in light responsiveness
arahy.Tifrunner.gnm2.ann1.SERN02.1	AhTGA18	MRE	AACCTAA	1239	7	-	Petroselinum crispum	MYB binding site involved in light responsiveness
arahy.Tifrunner.gnm2.ann1.W15JJQ.1	AhTGA10	MRE	AACCTAA	675	7	+	Petroselinum crispum	MYB binding site involved in light responsiveness
arahy.Tifrunner.gnm2.ann1.661MCQ.1	AhTGA06	O2-site	GATGATGTGG	1280	9	+	Zea mays	cis-acting regulatory element involved in zein metabolism regulation
arahy.Tifrunner.gnm2.ann1.H6GQLR.1	AhTGA15	O2-site	GATGATGTGG	1301	9	+	Zea mays	cis-acting regulatory element involved in zein metabolism regulation
arahy.Tifrunner.gnm2.ann1.P1JBJN.1	AhTGA11	O2-site	GTTGACGTGA	332	9	-	Zea mays	cis-acting regulatory element involved in zein metabolism regulation
arahy.Tifrunner.gnm2.ann1.P1JBJN.1	AhTGA11	O2-site	GATGATGTGG	1322	9	-	Zea mays	cis-acting regulatory element involved in zein metabolism regulation
arahy.Tifrunner.gnm2.ann1.P1JBJN.1	AhTGA11	O2-site	GATGA(C/T)(A/G)TG(A/G)	1327	8	-	Zea mays	cis-acting regulatory element involved in zein metabolism regulation
arahy.Tifrunner.gnm2.ann1.0GP62G.1	AhTGA05	P-box	CCTTTTG	1114	7	+	Oryza sativa	gibberellin-responsive element
arahy.Tifrunner.gnm2.ann1.0GP62G.1	AhTGA05	P-box	CCTTTTG	1212	7	-	Oryza sativa	gibberellin-responsive element
arahy.Tifrunner.gnm2.ann1.980X4K.1	AhTGA17	P-box	CCTTTTG	1128	7	-	Oryza sativa	gibberellin-responsive element
arahy.Tifrunner.gnm2.ann1.AAI19J.1	AhTGA20	P-box	CCTTTTG	1713	7	+	Oryza sativa	gibberellin-responsive element
arahy.Tifrunner.gnm2.ann1.P1JBJN.1	AhTGA11	P-box	CCTTTTG	1682	7	+	Oryza sativa	gibberellin-responsive element
arahy.Tifrunner.gnm2.ann1.661MCQ.1	AhTGA06	RY-element	CATGCATG	318	8	+	Helianthus annuus	cis-acting regulatory element involved in seed-specific regulation
arahy.Tifrunner.gnm2.ann1.H6GQLR.1	AhTGA15	RY-element	CATGCATG	264	8	+	Helianthus annuus	cis-acting regulatory element involved in seed-specific regulation
arahy.Tifrunner.gnm2.ann1.SERN02.1	AhTGA18	RY-element	CATGCATG	75	8	+	Helianthus annuus	cis-acting regulatory element involved in seed-specific regulation
arahy.Tifrunner.gnm2.ann1.980X4K.1	AhTGA17	TCA-element	CCATCTTTTT	1419	9	+	Nicotiana tabacum	cis-acting element involved in salicylic acid responsiveness
arahy.Tifrunner.gnm2.ann1.AAI19J.1	AhTGA20	TCA-element	CCATCTTTTT	1084	9	+	Nicotiana tabacum	cis-acting element involved in salicylic acid responsiveness
arahy.Tifrunner.gnm2.ann1.EH3L7F.1	AhTGA13	TCA-element	CCATCTTTTT	409	9	-	Nicotiana tabacum	cis-acting element involved in salicylic acid responsiveness
arahy.Tifrunner.gnm2.ann1.EH3L7F.1	AhTGA13	TCA-element	CCATCTTTTT	834	9	+	Nicotiana tabacum	cis-acting element involved in salicylic acid responsiveness
arahy.Tifrunner.gnm2.ann1.EH3L7F.1	AhTGA13	TCA-element	CCATCTTTTT	856	9	-	Nicotiana tabacum	cis-acting element involved in salicylic acid responsiveness
arahy.Tifrunner.gnm2.ann1.H6GQLR.1	AhTGA15	TCA-element	CCATCTTTTT	294	9	-	Nicotiana tabacum	cis-acting element involved in salicylic acid responsiveness
arahy.Tifrunner.gnm2.ann1.H6GQLR.1	AhTGA15	TCA-element	CCATCTTTTT	819	9	+	Nicotiana tabacum	cis-acting element involved in salicylic acid responsiveness
arahy.Tifrunner.gnm2.ann1.J1CFJJ.1	AhTGA08	TCA-element	CCATCTTTTT	53	9	+	Nicotiana tabacum	cis-acting element involved in salicylic acid responsiveness
arahy.Tifrunner.gnm2.ann1.J1CFJJ.1	AhTGA08	TCA-element	CCATCTTTTT	1914	9	+	Nicotiana tabacum	cis-acting element involved in salicylic acid responsiveness
arahy.Tifrunner.gnm2.ann1.KZ9VWQ.1	AhTGA07	TCA-element	CCATCTTTTT	1416	9	+	Nicotiana tabacum	cis-acting element involved in salicylic acid responsiveness
arahy.Tifrunner.gnm2.ann1.LTZY89.1	AhTGA02	TCA-element	CCATCTTTTT	395	9	-	Nicotiana tabacum	cis-acting element involved in salicylic acid responsiveness
arahy.Tifrunner.gnm2.ann1.LTZY89.1	AhTGA02	TCA-element	CCATCTTTTT	820	9	+	Nicotiana tabacum	cis-acting element involved in salicylic acid responsiveness
arahy.Tifrunner.gnm2.ann1.P1JBJN.1	AhTGA11	TCA-element	TCAGAAGAGG	907	9	+	Brassica oleracea	cis-acting element involved in salicylic acid responsiveness
arahy.Tifrunner.gnm2.ann1.PHPT4F.1	AhTGA16	TCA-element	CCATCTTTTT	1422	9	+	Nicotiana tabacum	cis-acting element involved in salicylic acid responsiveness
arahy.Tifrunner.gnm2.ann1.RKP385.1	AhTGA09	TCA-element	CCATCTTTTT	606	9	-	Nicotiana tabacum	cis-acting element involved in salicylic acid responsiveness
arahy.Tifrunner.gnm2.ann1.S1DMKE.1	AhTGA03	TCA-element	CCATCTTTTT	395	9	-	Nicotiana tabacum	cis-acting element involved in salicylic acid responsiveness
arahy.Tifrunner.gnm2.ann1.S1DMKE.1	AhTGA03	TCA-element	CCATCTTTTT	820	9	+	Nicotiana tabacum	cis-acting element involved in salicylic acid responsiveness
arahy.Tifrunner.gnm2.ann1.SERN02.1	AhTGA18	TCA-element	TCAGAAGAGG	453	9	-	Brassica oleracea	cis-acting element involved in salicylic acid responsiveness
arahy.Tifrunner.gnm2.ann1.SERN02.1	AhTGA18	TCA-element	CCATCTTTTT	604	9	-	Nicotiana tabacum	cis-acting element involved in salicylic acid responsiveness
arahy.Tifrunner.gnm2.ann1.W15JJQ.1	AhTGA10	TCA-element	TCAGAAGAGG	53	9	-	Brassica oleracea	cis-acting element involved in salicylic acid responsiveness
arahy.Tifrunner.gnm2.ann1.661MCQ.1	AhTGA06	TCCC-motif	TCTCCCT	1925	7	-	Spinacia oleracea	part of a light responsive element
arahy.Tifrunner.gnm2.ann1.6K442L.1	AhTGA14	TCCC-motif	TCTCCCT	1661	7	+	Spinacia oleracea	part of a light responsive element
arahy.Tifrunner.gnm2.ann1.EH3L7F.1	AhTGA13	TCCC-motif	TCTCCCT	186	7	+	Spinacia oleracea	part of a light responsive element
arahy.Tifrunner.gnm2.ann1.H6GQLR.1	AhTGA15	TCCC-motif	TCTCCCT	1941	7	-	Spinacia oleracea	part of a light responsive element
arahy.Tifrunner.gnm2.ann1.KZ9VWQ.1	AhTGA07	TCCC-motif	TCTCCCT	1392	7	-	Spinacia oleracea	part of a light responsive element
arahy.Tifrunner.gnm2.ann1.LTZY89.1	AhTGA02	TCCC-motif	TCTCCCT	177	7	+	Spinacia oleracea	part of a light responsive element
arahy.Tifrunner.gnm2.ann1.S1DMKE.1	AhTGA03	TCCC-motif	TCTCCCT	177	7	+	Spinacia oleracea	part of a light responsive element
arahy.Tifrunner.gnm2.ann1.661MCQ.1	AhTGA06	TC-rich repeats	GTTTTCTTAC	722	9	+	Nicotiana tabacum	cis-acting element involved in defense and stress responsiveness
arahy.Tifrunner.gnm2.ann1.6K442L.1	AhTGA14	TC-rich repeats	GTTTTCTTAC	1303	9	+	Nicotiana tabacum	cis-acting element involved in defense and stress responsiveness
arahy.Tifrunner.gnm2.ann1.980X4K.1	AhTGA17	TC-rich repeats	GTTTTCTTAC	1326	9	-	Nicotiana tabacum	cis-acting element involved in defense and stress responsiveness
arahy.Tifrunner.gnm2.ann1.980X4K.1	AhTGA17	TC-rich repeats	ATTCTCTAAC	1734	9	-	Nicotiana tabacum	cis-acting element involved in defense and stress responsiveness
arahy.Tifrunner.gnm2.ann1.AAI19J.1	AhTGA20	TC-rich repeats	GTTTTCTTAC	1259	9	+	Nicotiana tabacum	cis-acting element involved in defense and stress responsiveness
arahy.Tifrunner.gnm2.ann1.EH3L7F.1	AhTGA13	TC-rich repeats	GTTTTCTTAC	217	9	+	Nicotiana tabacum	cis-acting element involved in defense and stress responsiveness
arahy.Tifrunner.gnm2.ann1.J1CFJJ.1	AhTGA08	TC-rich repeats	GTTTTCTTAC	716	9	+	Nicotiana tabacum	cis-acting element involved in defense and stress responsiveness
arahy.Tifrunner.gnm2.ann1.J1CFJJ.1	AhTGA08	TC-rich repeats	GTTTTCTTAC	1821	9	-	Nicotiana tabacum	cis-acting element involved in defense and stress responsiveness
arahy.Tifrunner.gnm2.ann1.K04A4E.1	AhTGA19	TC-rich repeats	ATTCTCTAAC	124	9	-	Nicotiana tabacum	cis-acting element involved in defense and stress responsiveness
arahy.Tifrunner.gnm2.ann1.K04A4E.1	AhTGA19	TC-rich repeats	GTTTTCTTAC	513	10	+	Nicotiana tabacum	cis-acting element involved in defense and stress responsiveness
arahy.Tifrunner.gnm2.ann1.LTZY89.1	AhTGA02	TC-rich repeats	GTTTTCTTAC	208	9	+	Nicotiana tabacum	cis-acting element involved in defense and stress responsiveness
arahy.Tifrunner.gnm2.ann1.LTZY89.1	AhTGA02	TC-rich repeats	GTTTTCTTAC	861	9	-	Nicotiana tabacum	cis-acting element involved in defense and stress responsiveness
arahy.Tifrunner.gnm2.ann1.P1JBJN.1	AhTGA11	TC-rich repeats	ATTCTCTAAC	1004	9	+	Nicotiana tabacum	cis-acting element involved in defense and stress responsiveness
arahy.Tifrunner.gnm2.ann1.RIV6ZB.1	AhTGA04	TC-rich repeats	ATTCTCTAAC	108	9	+	Nicotiana tabacum	cis-acting element involved in defense and stress responsiveness
arahy.Tifrunner.gnm2.ann1.S1DMKE.1	AhTGA03	TC-rich repeats	GTTTTCTTAC	208	9	+	Nicotiana tabacum	cis-acting element involved in defense and stress responsiveness
arahy.Tifrunner.gnm2.ann1.S1DMKE.1	AhTGA03	TC-rich repeats	GTTTTCTTAC	861	9	-	Nicotiana tabacum	cis-acting element involved in defense and stress responsiveness
arahy.Tifrunner.gnm2.ann1.W15JJQ.1	AhTGA10	TC-rich repeats	ATTCTCTAAC	205	9	-	Nicotiana tabacum	cis-acting element involved in defense and stress responsiveness
arahy.Tifrunner.gnm2.ann1.W15JJQ.1	AhTGA10	TC-rich repeats	ATTCTCTAAC	407	10	-	Nicotiana tabacum	cis-acting element involved in defense and stress responsiveness
arahy.Tifrunner.gnm2.ann1.661MCQ.1	AhTGA06	TCT-motif	TCTTAC	726	6	+	Arabidopsis thaliana	part of a light responsive element
arahy.Tifrunner.gnm2.ann1.6K442L.1	AhTGA14	TCT-motif	TCTTAC	189	6	+	Arabidopsis thaliana	part of a light responsive element
arahy.Tifrunner.gnm2.ann1.6K442L.1	AhTGA14	TCT-motif	TCTTAC	1229	6	-	Arabidopsis thaliana	part of a light responsive element
arahy.Tifrunner.gnm2.ann1.6K442L.1	AhTGA14	TCT-motif	TCTTAC	1307	6	+	Arabidopsis thaliana	part of a light responsive element
arahy.Tifrunner.gnm2.ann1.980X4K.1	AhTGA17	TCT-motif	TCTTAC	603	6	+	Arabidopsis thaliana	part of a light responsive element
arahy.Tifrunner.gnm2.ann1.H6GQLR.1	AhTGA15	TCT-motif	TCTTAC	551	6	+	Arabidopsis thaliana	part of a light responsive element
arahy.Tifrunner.gnm2.ann1.J1CFJJ.1	AhTGA08	TCT-motif	TCTTAC	720	6	+	Arabidopsis thaliana	part of a light responsive element
arahy.Tifrunner.gnm2.ann1.K04A4E.1	AhTGA19	TCT-motif	TCTTAC	517	6	+	Arabidopsis thaliana	part of a light responsive element
arahy.Tifrunner.gnm2.ann1.KZ9VWQ.1	AhTGA07	TCT-motif	TCTTAC	1529	6	+	Arabidopsis thaliana	part of a light responsive element
arahy.Tifrunner.gnm2.ann1.KZ9VWQ.1	AhTGA07	TCT-motif	TCTTAC	1746	6	+	Arabidopsis thaliana	part of a light responsive element
arahy.Tifrunner.gnm2.ann1.PHPT4F.1	AhTGA16	TCT-motif	TCTTAC	1534	6	+	Arabidopsis thaliana	part of a light responsive element
arahy.Tifrunner.gnm2.ann1.PHPT4F.1	AhTGA16	TCT-motif	TCTTAC	1751	6	+	Arabidopsis thaliana	part of a light responsive element
arahy.Tifrunner.gnm2.ann1.RIV6ZB.1	AhTGA04	TCT-motif	TCTTAC	1228	6	-	Arabidopsis thaliana	part of a light responsive element
arahy.Tifrunner.gnm2.ann1.RIV6ZB.1	AhTGA04	TCT-motif	TCTTAC	1306	6	+	Arabidopsis thaliana	part of a light responsive element
arahy.Tifrunner.gnm2.ann1.0GP62G.1	AhTGA05	TGACG-motif	TGACG	528	5	+	Hordeum vulgare	cis-acting regulatory element involved in the MeJA-responsiveness
arahy.Tifrunner.gnm2.ann1.661MCQ.1	AhTGA06	TGACG-motif	TGACG	423	5	-	Hordeum vulgare	cis-acting regulatory element involved in the MeJA-responsiveness
arahy.Tifrunner.gnm2.ann1.661MCQ.1	AhTGA06	TGACG-motif	TGACG	1907	5	+	Hordeum vulgare	cis-acting regulatory element involved in the MeJA-responsiveness
arahy.Tifrunner.gnm2.ann1.6K442L.1	AhTGA14	TGACG-motif	TGACG	360	5	-	Hordeum vulgare	cis-acting regulatory element involved in the MeJA-responsiveness
arahy.Tifrunner.gnm2.ann1.6K442L.1	AhTGA14	TGACG-motif	TGACG	405	5	-	Hordeum vulgare	cis-acting regulatory element involved in the MeJA-responsiveness
arahy.Tifrunner.gnm2.ann1.6K442L.1	AhTGA14	TGACG-motif	TGACG	549	5	+	Hordeum vulgare	cis-acting regulatory element involved in the MeJA-responsiveness
arahy.Tifrunner.gnm2.ann1.6K442L.1	AhTGA14	TGACG-motif	TGACG	552	5	-	Hordeum vulgare	cis-acting regulatory element involved in the MeJA-responsiveness
arahy.Tifrunner.gnm2.ann1.H6GQLR.1	AhTGA15	TGACG-motif	TGACG	1923	5	+	Hordeum vulgare	cis-acting regulatory element involved in the MeJA-responsiveness
arahy.Tifrunner.gnm2.ann1.J1CFJJ.1	AhTGA08	TGACG-motif	TGACG	980	5	+	Hordeum vulgare	cis-acting regulatory element involved in the MeJA-responsiveness
arahy.Tifrunner.gnm2.ann1.KZ9VWQ.1	AhTGA07	TGACG-motif	TGACG	946	5	-	Hordeum vulgare	cis-acting regulatory element involved in the MeJA-responsiveness
arahy.Tifrunner.gnm2.ann1.KZ9VWQ.1	AhTGA07	TGACG-motif	TGACG	1341	5	-	Hordeum vulgare	cis-acting regulatory element involved in the MeJA-responsiveness
arahy.Tifrunner.gnm2.ann1.P1JBJN.1	AhTGA11	TGACG-motif	TGACG	335	5	-	Hordeum vulgare	cis-acting regulatory element involved in the MeJA-responsiveness
arahy.Tifrunner.gnm2.ann1.P1JBJN.1	AhTGA11	TGACG-motif	TGACG	643	5	-	Hordeum vulgare	cis-acting regulatory element involved in the MeJA-responsiveness
arahy.Tifrunner.gnm2.ann1.P1JBJN.1	AhTGA11	TGACG-motif	TGACG	1268	5	+	Hordeum vulgare	cis-acting regulatory element involved in the MeJA-responsiveness
arahy.Tifrunner.gnm2.ann1.P1JBJN.1	AhTGA11	TGACG-motif	TGACG	1505	5	-	Hordeum vulgare	cis-acting regulatory element involved in the MeJA-responsiveness
arahy.Tifrunner.gnm2.ann1.PHPT4F.1	AhTGA16	TGACG-motif	TGACG	948	5	-	Hordeum vulgare	cis-acting regulatory element involved in the MeJA-responsiveness
arahy.Tifrunner.gnm2.ann1.PHPT4F.1	AhTGA16	TGACG-motif	TGACG	1345	5	-	Hordeum vulgare	cis-acting regulatory element involved in the MeJA-responsiveness
arahy.Tifrunner.gnm2.ann1.RIV6ZB.1	AhTGA04	TGACG-motif	TGACG	350	5	-	Hordeum vulgare	cis-acting regulatory element involved in the MeJA-responsiveness
arahy.Tifrunner.gnm2.ann1.RIV6ZB.1	AhTGA04	TGACG-motif	TGACG	395	5	-	Hordeum vulgare	cis-acting regulatory element involved in the MeJA-responsiveness
arahy.Tifrunner.gnm2.ann1.RIV6ZB.1	AhTGA04	TGACG-motif	TGACG	539	5	+	Hordeum vulgare	cis-acting regulatory element involved in the MeJA-responsiveness
arahy.Tifrunner.gnm2.ann1.RIV6ZB.1	AhTGA04	TGACG-motif	TGACG	542	5	-	Hordeum vulgare	cis-acting regulatory element involved in the MeJA-responsiveness
arahy.Tifrunner.gnm2.ann1.661MCQ.1	AhTGA06	TGA-element	AACGAC	576	6	+	Brassica oleracea	auxin-responsive element
arahy.Tifrunner.gnm2.ann1.EH3L7F.1	AhTGA13	TGA-element	AACGAC	326	6	-	Brassica oleracea	auxin-responsive element
arahy.Tifrunner.gnm2.ann1.H6GQLR.1	AhTGA15	TGA-element	AACGAC	400	6	+	Brassica oleracea	auxin-responsive element
arahy.Tifrunner.gnm2.ann1.KZ9VWQ.1	AhTGA07	TGA-element	AACGAC	350	6	+	Brassica oleracea	auxin-responsive element
arahy.Tifrunner.gnm2.ann1.P1JBJN.1	AhTGA11	TGA-element	AACGAC	721	6	+	Brassica oleracea	auxin-responsive element
arahy.Tifrunner.gnm2.ann1.PHPT4F.1	AhTGA16	TGA-element	AACGAC	915	6	+	Brassica oleracea	auxin-responsive element
arahy.Tifrunner.gnm2.ann1.RKP385.1	AhTGA09	TGA-element	AACGAC	928	6	-	Brassica oleracea	auxin-responsive element
arahy.Tifrunner.gnm2.ann1.RKP385.1	AhTGA09	TGA-element	AACGAC	952	6	-	Brassica oleracea	auxin-responsive element
arahy.Tifrunner.gnm2.ann1.SERN02.1	AhTGA18	TGA-element	AACGAC	932	6	-	Brassica oleracea	auxin-responsive element
arahy.Tifrunner.gnm2.ann1.SERN02.1	AhTGA18	TGA-element	AACGAC	956	6	-	Brassica oleracea	auxin-responsive element

## Sheet: number
Table S5-2 Cis-regulatory elements number in the promoter region of peanut in this study.
	Gene.ID	Box 4	ATCT-motif	ATC-motif	TCT-motif	TCCC-motif	chs-CMA1a	LAMP-element	I-box	Gap-box	GTGGC-motif	GA-motif	GATA-motif	Box II	G-box	G-Box	GT1-motif	3-AF1 binding site	MRE	AE-box	AT1-motif	ACE	AT-rich element	ARE	CAT-box	O2-site	GCN4_motif	RY-element	circadian	CGTCA-motif	TGACG-motif	ABRE	GARE-motif	P-box	TCA-element	TGA-element	AuxRE	AuxRR-core	LTR	TC-rich repeats	MBS	MBSI	CCAAT-box
10	AhTGA01	6	0	0	0	0	0	0	0	0	0	0	0	0	0	0	0	1	1	1	3	2	0	1	0	0	0	0	0	0	0	0	0	0	0	0	0	0	2	0	0	0	0
11	AhTGA02	2	0	0	0	1	0	2	3	0	0	0	2	0	0	0	1	0	0	1	1	0	0	1	0	0	0	0	0	0	0	0	0	0	2	0	0	0	2	2	0	0	0
12	AhTGA03	2	0	0	0	1	0	2	3	0	0	0	2	0	0	0	1	0	1	0	1	0	0	1	0	0	0	0	0	0	0	0	0	0	2	0	0	0	2	2	0	0	0
13	AhTGA04	2	0	0	2	0	0	0	1	1	1	0	0	0	0	6	1	0	0	0	0	0	0	3	0	0	0	0	1	4	4	5	1	0	0	0	0	0	2	1	1	0	0
14	AhTGA05	3	0	0	0	0	0	1	0	0	0	0	0	0	0	0	1	0	1	0	0	0	0	0	1	0	1	0	0	1	1	0	1	2	0	0	0	0	1	0	0	0	0
15	AhTGA06	3	1	0	1	1	0	0	0	0	0	0	0	0	1	0	0	0	0	1	1	0	0	2	0	1	0	1	0	2	2	2	0	0	0	1	0	0	2	1	0	1	1
16	AhTGA07	4	1	0	2	1	0	0	0	0	0	0	1	0	0	0	2	0	0	0	0	0	0	1	1	0	0	0	0	2	2	0	0	0	1	1	0	1	2	0	0	1	0
17	AhTGA08	5	0	0	1	0	0	1	1	0	0	1	0	0	0	0	0	0	0	0	1	1	0	2	0	0	1	0	0	1	1	0	0	0	2	0	0	1	0	2	0	0	0
18	AhTGA09	1	0	0	0	0	2	1	1	0	0	1	0	0	1	0	1	0	1	1	0	0	0	3	0	0	0	0	0	0	0	1	1	0	1	2	0	0	0	0	2	0	0
19	AhTGA10	3	0	0	0	0	0	0	0	1	0	0	0	0	0	0	0	0	1	0	0	0	1	2	0	0	0	0	0	0	0	0	0	0	1	0	0	0	0	2	1	0	0
20	AhTGA11	3	1	1	0	0	1	0	0	0	0	0	1	0	1	0	2	1	1	1	0	0	0	0	0	3	0	0	0	4	4	1	0	1	1	1	0	0	0	1	2	0	0
21	AhTGA12	7	0	0	0	0	0	0	0	0	0	1	0	0	0	0	0	1	0	1	1	1	0	1	0	0	0	0	0	0	0	0	0	0	0	0	0	0	1	0	0	0	0
22	AhTGA13	1	0	0	0	1	0	2	3	0	0	0	3	0	0	0	1	0	1	0	0	0	2	1	0	0	0	0	0	0	0	0	0	0	3	1	0	0	2	1	0	0	0
23	AhTGA14	5	0	0	3	1	0	0	1	1	1	0	0	0	0	6	1	0	0	0	0	0	0	3	0	0	0	0	1	4	4	4	1	0	0	0	0	0	2	1	1	0	0
24	AhTGA15	2	0	0	1	1	0	0	1	0	0	0	0	0	1	0	2	0	0	1	0	0	0	1	0	1	0	1	0	1	1	1	0	0	2	1	0	0	2	0	1	0	1
25	AhTGA16	7	0	0	2	0	0	0	0	0	0	0	1	0	1	0	2	0	0	0	0	0	0	0	1	0	0	0	0	2	2	1	0	0	1	1	0	0	1	0	0	0	0
26	AhTGA17	6	0	0	1	0	0	1	1	0	0	0	0	0	0	0	0	0	0	0	0	0	0	1	1	0	1	0	0	0	0	0	0	1	1	0	1	1	0	2	0	0	0
27	AhTGA18	1	0	0	0	0	0	1	1	0	0	0	0	1	0	0	0	0	1	2	0	0	0	2	0	0	0	1	0	0	0	0	1	0	2	2	0	0	0	0	2	0	0
28	AhTGA19	3	0	1	1	0	0	0	0	0	0	0	0	0	0	1	1	0	0	0	0	0	1	2	0	0	0	0	0	0	0	1	0	0	0	0	0	0	0	2	1	0	0
29	AhTGA20	8	0	0	0	0	1	0	0	0	0	0	0	0	0	0	1	0	1	1	0	0	0	5	2	0	1	0	0	0	0	0	0	1	1	0	0	0	0	1	0	0	0

## Sheet: Classification criteria
Table S5-3 Classification criteria for Cis-regulatory elements in promoters.
Founctions Group	plant growth and development	Founctions Group	stress responsive	Founctions Group	hormone responsive
light responsive	Box 4	MeJA-responsiveness	CGTCA-motif	low-temperature responsiveness	LTR
	ATCT-motif		TGACG-motif	defense and stress responsiveness	TC-rich repeats
	ATC-motif	abscisic acid responsiveness	ABRE	drought-inducibility	MBS
	GT1-motif	gibberellin-responsive element	GARE-motif		MBSI
	TCT-motif		P-box		CCAAT-box
	TCCC-motif	salicylic acid responsiveness	TCA-element
	chs-CMA1a	auxin-responsive element	TGA-element
	LAMP-element		AuxRE
	I-box		AuxRR-core
	Gap-box
	GTGGC-motif
	GA-motif
	GATA-motif
	Box II
	G-Box
	GT1-motif
	3-AF1 binding site
	MRE
	AE-box
	AT1-motif
	ACE
	AT-rich element
anaerobic induction	ARE
meristem expression	CAT-box
metabolism regulation	O2-site
endosperm expression	GCN4_motif
seed-specific regulation	RY-element
circadian control	circadian
