# Supplementary material for: Genome-wide analysis reveals regulatory mechanisms and expression patterns of TGA genes in peanut under abiotic stress and hormone treatments
Source: Frontiers journal article supplement (doi:10.3389/fpls.2023.1269200), 2023-11-21
Supplement: Data_Sheet_1.zip [file Data_Sheet_1.zip]

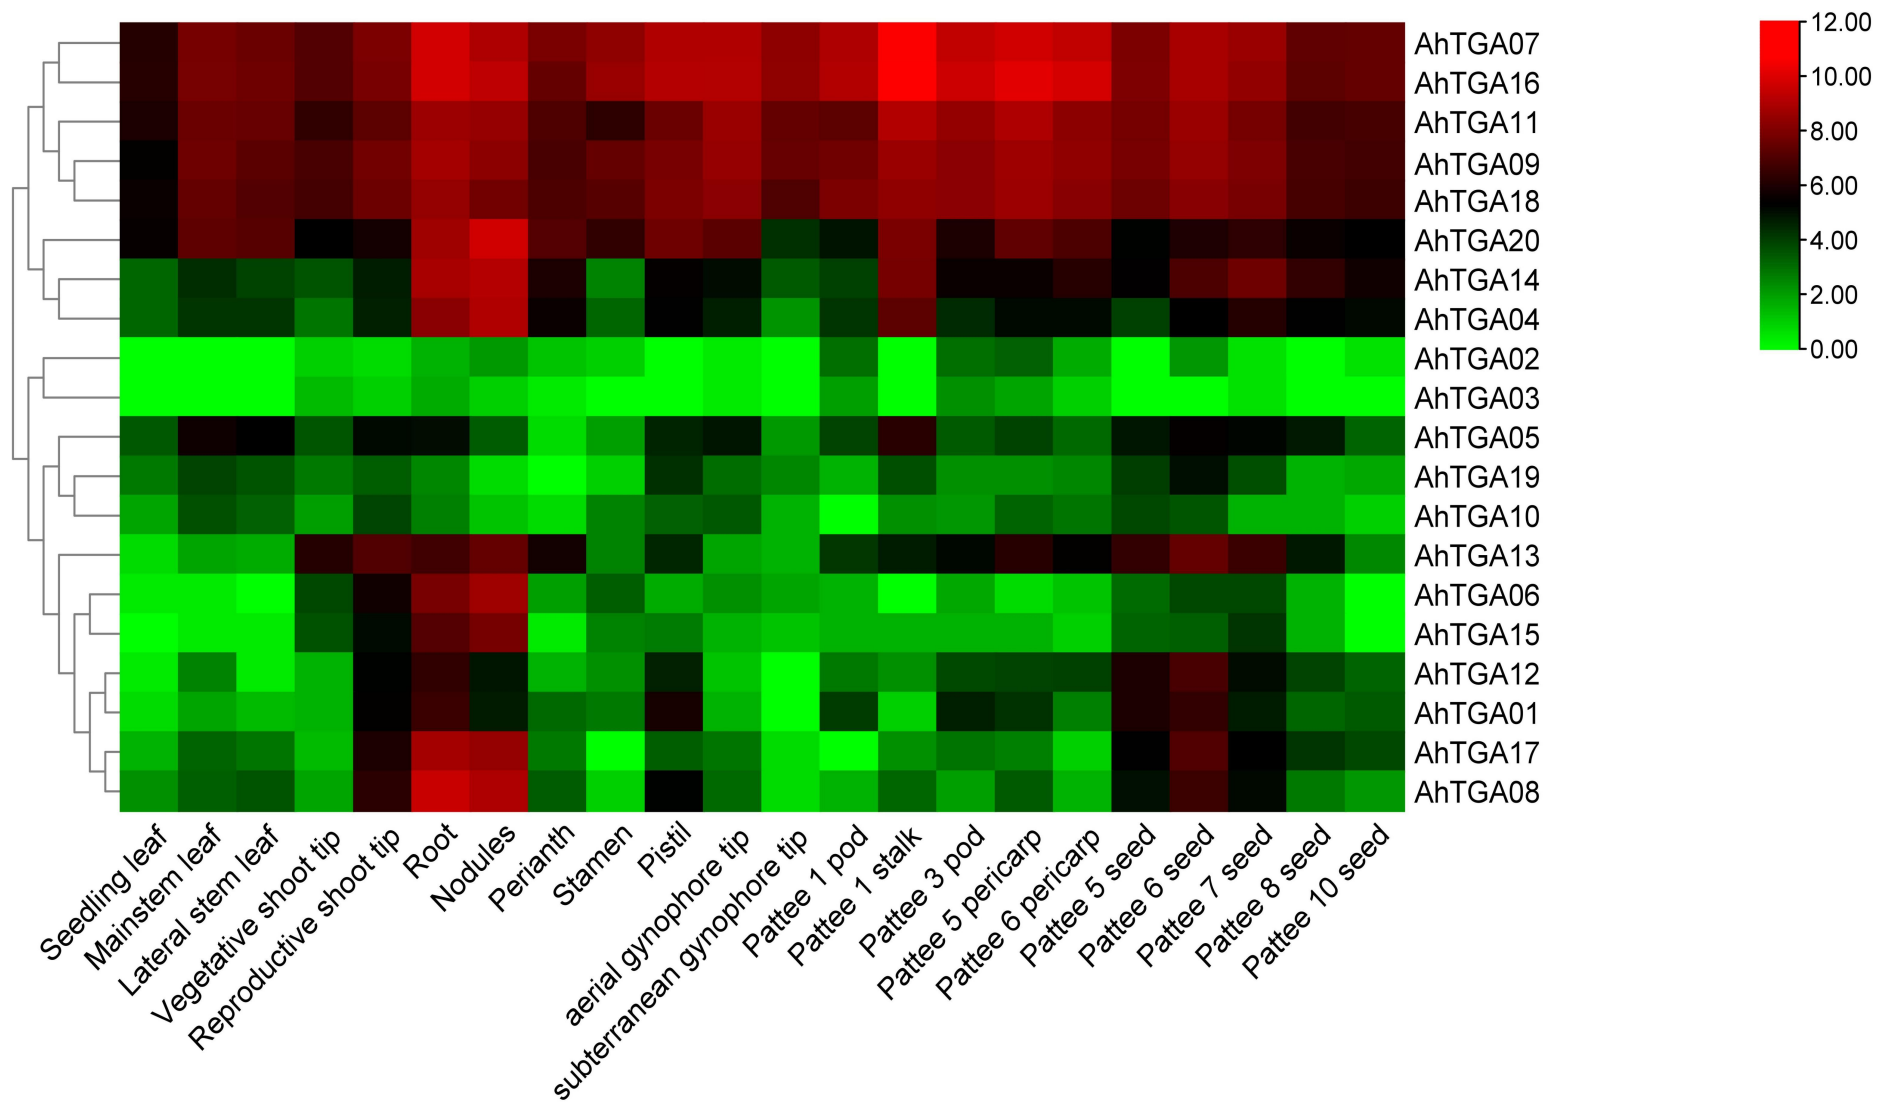

**Figure S4** Expression profiles of 20 *AhTGAs* in 22 different tissues. Heat-map clustering based on FPKM expression of 20 *AhTGA* genes in different peanut tissues. Log2-transformed values are used in a color-coded heatmap, with bars representing normalized FPKM (Log2) expression levels, and red for higher expression , green means low.
