# Supplementary material for: Genome-wide analysis reveals regulatory mechanisms and expression patterns of TGA genes in peanut under abiotic stress and hormone treatments
Source: Frontiers journal article supplement (doi:10.3389/fpls.2023.1269200), 2023-11-21
Supplement: Data_Sheet_1.zip [file Data_Sheet_1.zip]

|                   |   |                                                                                                                                                         |      |      |        |
|-------------------|---|---------------------------------------------------------------------------------------------------------------------------------------------------------|------|------|--------|
|                   |   | *                                                                                                                                                       | 100  | *    |        |
| AhTGA11-FH18      | : | ATGCCAGAGGCAAGCAGAGTTGATTCTTTTGTGTTGTCCGACTTTGATCAATCAATTGGAAATCACTTGGAGAATGCTGTGCAATTGAGTGGAAATCCTGTAAATAACTCACTGAAAGTAAGTAGCCAGACGATTTCCTGGTCTCTGTT   |      |      | : 150  |
| AhTGA11-Tifrunner | : | ATGCCAGAGGCAAGCAGAGTTGATTCTTTTGTGTTGTCCGACTTTGATCAATCAATTGGAAATCACTTGGAGAATGCTGTGCAATTGAGTGGAAATCCTGTAAATAACTCACTGAAAGTAAGTAGCCAGACGATTTCCTGGTCTCTGTT   |      |      | : 150  |
|                   |   |                                                                                                                                                         | 200  | *    | 300    |
| AhTGA11-FH18      | : | CACCTTGGCACTTCTGATAGGTTGCCAATTTTCAGTTGATAGAAGCTCATTATGTACCTAGAAGACCGGACTGAGTTTGCTGGCAGAAAAGGTACAATCAACAAATCACATTATAATACCAAGTGGTGATACAGAAAACAGGAAGGGTCT  |      |      | : 300  |
| AhTGA11-Tifrunner | : | CACCTTGGCACTTCTGATAGGTTGCCAATTTTCAGTTGATAGAAGCTCATTATGTACCTAGAAGACCGGACTGAGTTTGCTGGCAGAAAAGGTACAATCAACAAATCACATTATAATACCAAGTGGTGATACAGAAAACAGGAAGGGTCT  |      |      | : 300  |
|                   |   |                                                                                                                                                         | 400  | *    |        |
| AhTGA11-FH18      | : | GCCATGGCTGATGCCAGTCCTAGAAGTATTTCTACAGATGCCGATACTGATGATAAGAATCAGCGGTTTGATGGAAGTCAATCCCTTGCTGCAAGTGGCTTCAGACTCAAGTGACAGATCAAAAGGATAAAACAGATCAGAAGACTCTC   |      |      | : 450  |
| AhTGA11-Tifrunner | : | GCCATGGCTGATGCCAGTCCTAGAAGTATTTCTACAGATGCCGATACTGATGATAAGAATCAGCGGTTTGATGGAAGTCAATCCCTTGCTGCAAGTGGCTTCAGACTCAAGTGACAGATCAAAAGGATAAAACAGATCAGAAGACTCTC   |      |      | : 450  |
|                   |   |                                                                                                                                                         | 500  | *    | 600    |
| AhTGA11-FH18      | : | CGCAGGCTTGCTCAGAATCGTGAGGCTGCAAGGAAAAGCCGATTGCGAAAAGAAAGTAGGATTTATCCCTTGAAGTTCCCTCCAGGGTAGCAGGTCTGGCTATGGTAACTCTTCATTGCTTAGTAGTGGACGAATGCAGAATCCAGCTTAT |      |      | : 600  |
| AhTGA11-Tifrunner | : | CGCAGGCTTGCTCAGAATCGTGAGGCTGCAAGGAAAAGCCGATTGCGAAAAGAAAGTAGGATTTATCCCTTGAAGTTCCCTCCAGGGTAGCAGGTCTGGCTATGGTAACTCTTCATTGCTTAGTAGTGGACGAATGCAGAATCCAGCTTAT |      |      | : 600  |
|                   |   |                                                                                                                                                         | 700  | *    |        |
| AhTGA11-FH18      | : | GTTCAACAATTTGGAAAGTAGTCGTTTGAAGTTGACGCAATTGGAGCAAGAGCTTCAGCGAGCCAGGCAGCAGGGAATCTTCATATCAAGTTCAGGTGATCAAGCACATTCAATGAGCGGCAATGGGGCCATGCAATTCGATGTCGAATAT |      |      | : 750  |
| AhTGA11-Tifrunner | : | GTTCAACAATTTGGAAAGTAGTCGTTTGAAGTTGACGCAATTGGAGCAAGAGCTTCAGCGAGCCAGGCAGCAGGGAATCTTCATATCAAGTTCAGGTGATCAAGCACATTCAATGAGCGGCAATGGGGCCATGCAATTCGATGTCGAATAT |      |      | : 750  |
|                   |   |                                                                                                                                                         | 800  | *    | 900    |
| AhTGA11-FH18      | : | GCAAGGTGGCTGGAAGAGCAGAATCGACAAATTAATGAGCTTAGAGCTGCTGTAAATTCTCATGCAAGTGATACAGAACTTCGAATGATTATTGATGGTATATTGGCGCATTATGATGACATATTTCCGCTGAAGGGCGTTGCAGCTAAG  |      |      | : 900  |
| AhTGA11-Tifrunner | : | GCAAGGTGGCTGGAAGAGCAGAATCGACAAATTAATGAGCTTAGAGCTGCTGTAAATTCTCATGCAAGTGATACAGAACTTCGAATGATTATTGATGGTATATTGGCGCATTATGATGACATATTTCCGCTGAAGGGCGTTGCAGCTAAG  |      |      | : 900  |
|                   |   |                                                                                                                                                         | 1000 | *    |        |
| AhTGA11-FH18      | : | GCTGATGTCCTCCACCTGTTGTCTGGCATGTGGAAAACCCAGCTGAGAGGTGTTTTCTGTGGCTCGGTGGCTTTTCGGTCATCTGAAGTCTCTTAAGCTCCTGGTAAATCAGTTGGAGCCTCTCACTGAGCAGCAGTTGGTGGGTATTACC |      |      | : 1050 |
| AhTGA11-Tifrunner | : | GCTGATGTCCTCCACCTGTTGTCTGGCATGTGGAAAACCCAGCTGAGAGGTGTTTTCTGTGGCTCGGTGGCTTTTCGGTCATCTGAAGTCTCTTAAGCTCCTGGTAAATCAGTTGGAGCCTCTCACTGAGCAGCAGTTGGTGGGTATTACC |      |      | : 1050 |
|                   |   |                                                                                                                                                         | 1100 | *    | 1200   |
| AhTGA11-FH18      | : | AACTTACAACAGTCTTCTCAACAGGCAGAGGATGCATTGTCTCAGGGCATGGAAGCACTGCAACAATCTCTTGCAGAGACTTTGTCTCTGGATCACTTGGCTCATCCGGTTCATCAGGGAATGTCCGAAATTACATGGGTCAAATGGCC   |      |      | : 1200 |
| AhTGA11-Tifrunner | : | AACTTACAACAGTCTTCTCAACAGGCAGAGGATGCATTGTCTCAGGGCATGGAAGCACTGCAACAATCTCTTGCAGAGACTTTGTCTCTGGATCACTTGGCTCATCCGGTTCATCAGGGAATGTCCGAAATTACATGGGTCAAATGGCC   |      |      | : 1200 |
|                   |   |                                                                                                                                                         | 1300 | *    |        |
| AhTGA11-FH18      | : | ATGGCCATGGGTAAGCTAGGGACACTCGAGGGGTTTATTCCGGCAGGCTGACAATTTGCGCCAGCAGACATTGCAACAAATGCACCGCATATTGACTACTCGCCAATCGGGCTCGTGCCTCCTTGCATACACGACTATTTTTCAAGGCTG  |      |      | : 1350 |
| AhTGA11-Tifrunner | : | ATGGCCATGGGTAAGCTAGGGACACTCGAGGGGTTTATTCCGGCAGGCTGACAATTTGCGCCAGCAGACATTGCAACAAATGCACCGCATATTGACTACTCGCCAATCGGGCTCGTGCCTCCTTGCATACACGACTATTTTTCAAGGCTG  |      |      | : 1350 |
|                   |   |                                                                                                                                                         |      |      |        |
| AhTGA11-FH18      | : | CGCGCTCTTAGTTCCCTCTGGCTCGCCCGCCCCAAGAGATTAA                                                                                                             | :    | 1392 |        |
| AhTGA11-Tifrunner | : | CGCGCTCTTAGTTCCCTCTGGCTCGCCCGCCCCAAGAGATTAA                                                                                                             | :    | 1392 |        |
|                   |   | CGCGCTCTTAGTTCCCTCTGGCTCGCCCGCCCCAAGAGATTAA                                                                                                             |      |      |        |

**Figure S5** The coding region gene sequence of the orthologous gene *AhTGAl1*-Tifrunner (reference genome) was aligned with the alleles of *AhTGAl1*-FH18.
