# Supplementary figures and images for: Genome-wide analysis reveals regulatory mechanisms and expression patterns of TGA genes in peanut under abiotic stress and hormone treatments
Source: Frontiers journal article supplement (doi:10.3389/fpls.2023.1269200), 2023-11-21

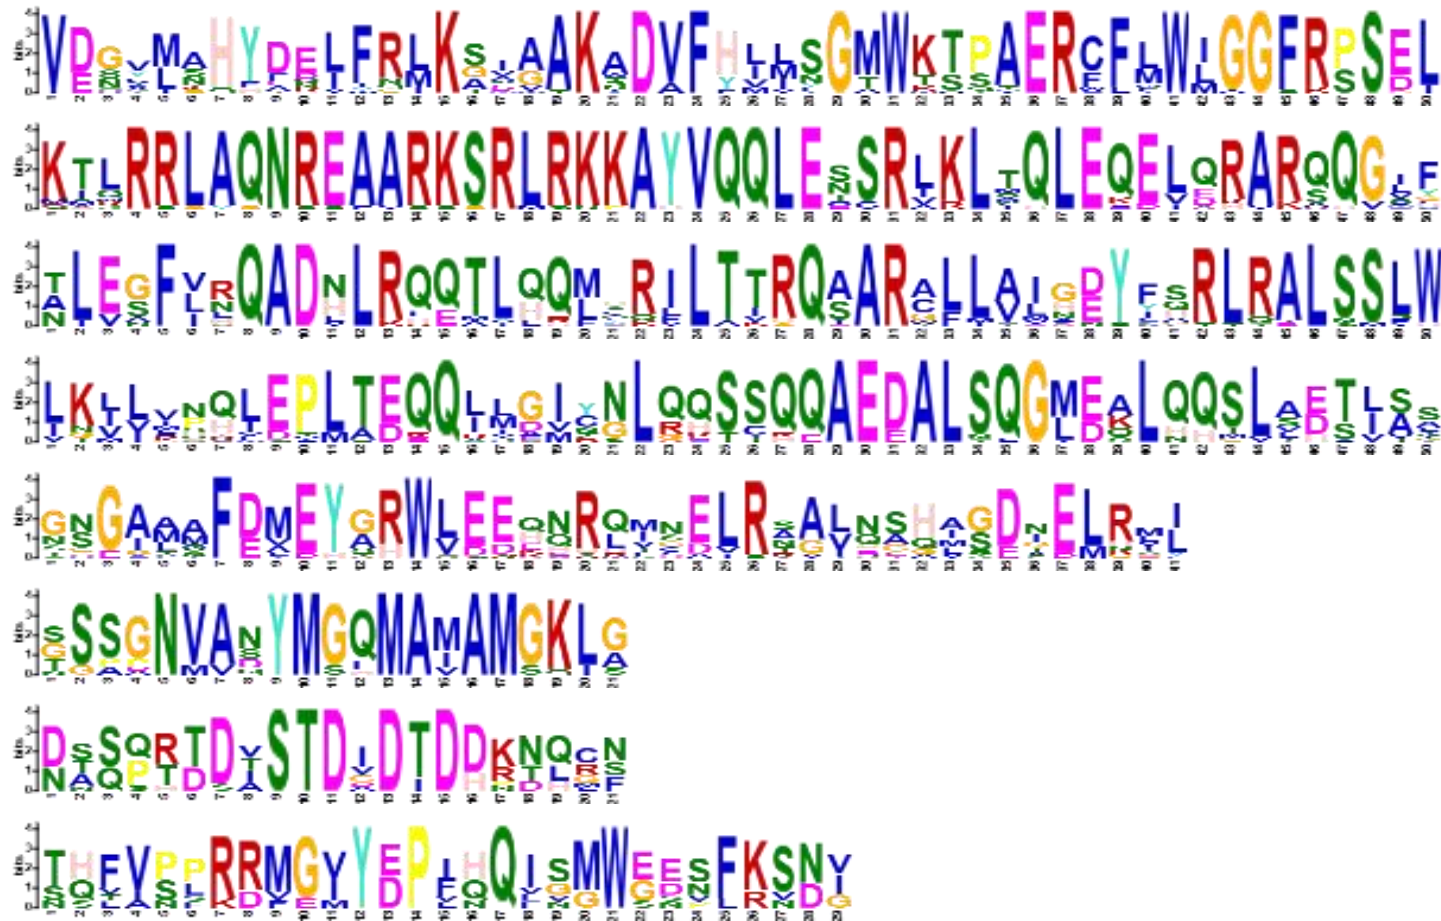

**E-value**

1.1e-1101

3.1e-1086

1.9e-910

2.7e-809

8.3e-612

6.9e-170

8.9e-082

2.2e-081

**Figure S2** Sequence logos of 10 motifs in cultivated peanut TGA proteins.

Supplement: Data_Sheet_1.zip [file Data_Sheet_1.zip]

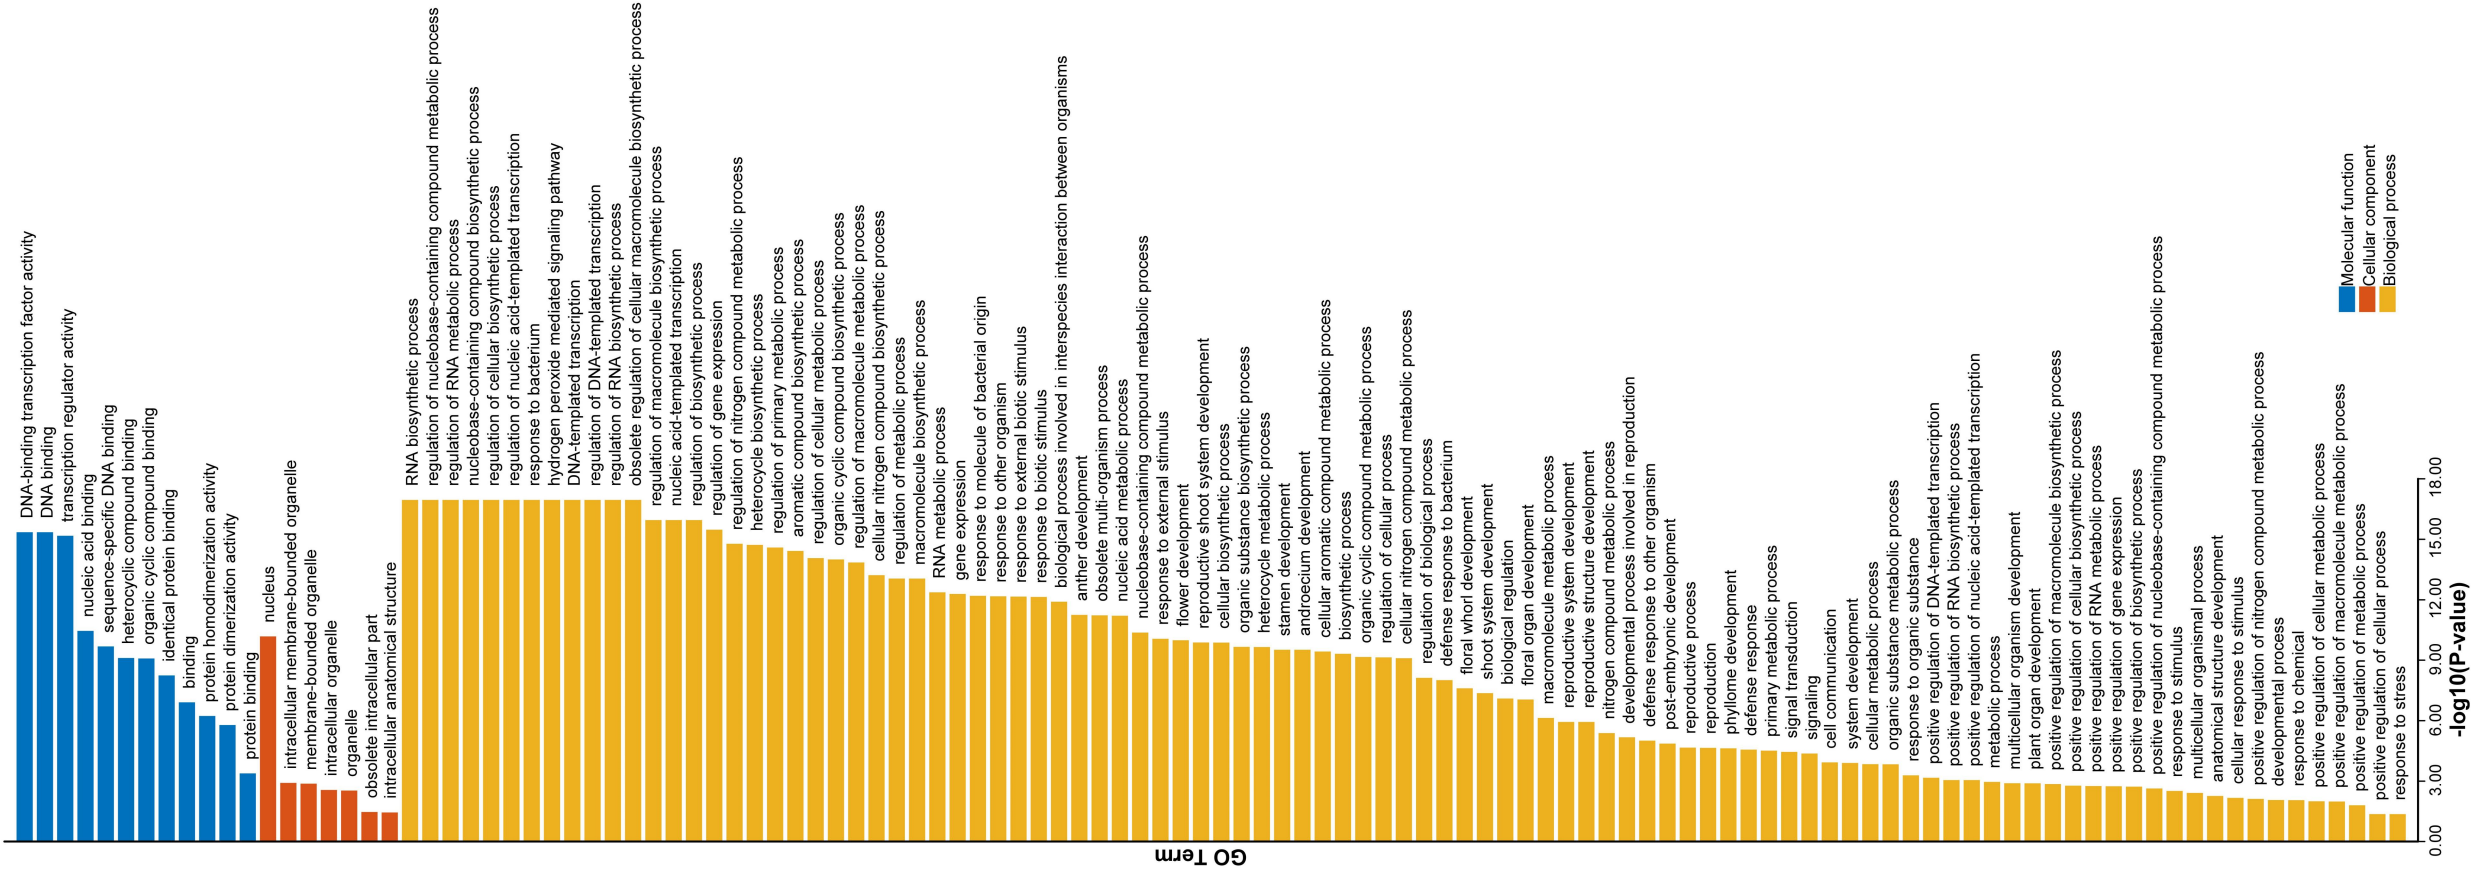

**Figure S3** Functional annotation of candidate genes interacted with *AhTGAs*.

Supplement: Data_Sheet_1.zip [file Data_Sheet_1.zip]
